# Supplementary material
Source: PubMed Central journal article supplement (PMC2818771)
Supplement: NIHMS165866-supplement-7_si_007.pdf [file NIHMS165866-supplement-7_si_007.pdf]

# Supplementary Information

---

*Repeatability and Reproducibility in Proteomic Identifications by Liquid Chromatography—Tandem Mass Spectrometry*

*October 16, 2009*

## **Contents**

|                                           |    |
|-------------------------------------------|----|
| Figure 1: CPTAC Sample Relationships..... | 2  |
| Table 1: NCI-20 Sample Composition .....  | 3  |
| Table 2: SOP Comparison Chart .....       | 4  |
| Gradient 1 .....                          | 7  |
| Gradient 2 .....                          | 7  |
| Gradient 3 .....                          | 8  |
| Study 1 Experimental Plan .....           | 9  |
| Study 2 Experimental Plan: SOP v1.0.....  | 14 |
| Study 3 Experimental Plan: SOP v2.0.....  | 20 |
| Study 5 Experimental Plan: SOP v2.1.....  | 30 |
| Study 6 Experimental Plan: SOP v2.2.....  | 47 |
| CPTAC Network Listing.....                | 63 |

**Figure 1: CPTAC Sample Relationships**

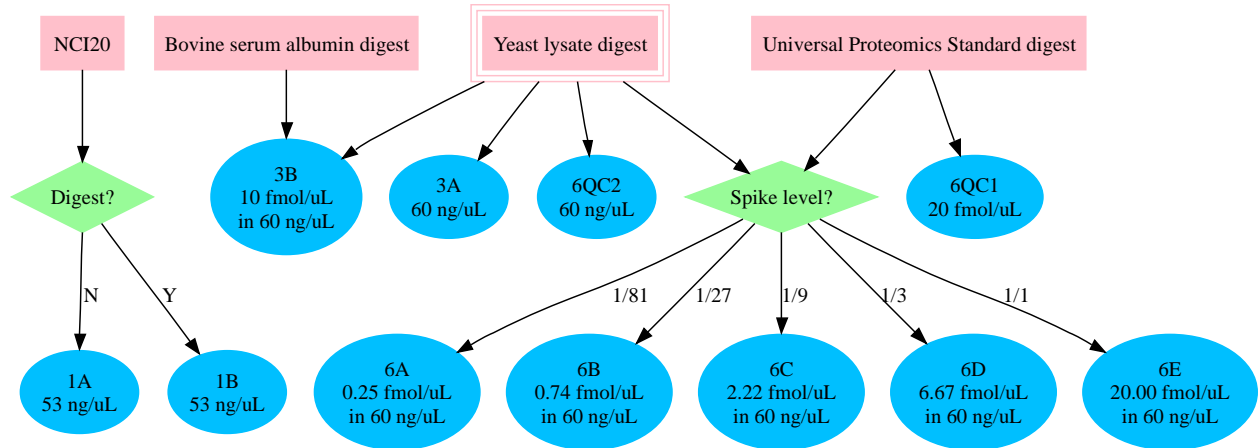

**Table 1: NCI-20 Sample Composition**

| <b>Protein</b>                  | <b>NCI-20 Target Concentration</b> | <b>Biological Source</b>                   | <b>Swiss-Prot Number</b> | <b>Swiss-Prot Abbrev</b> | <b>IPI ver. 3.48</b>                                     |
|---------------------------------|------------------------------------|--------------------------------------------|--------------------------|--------------------------|----------------------------------------------------------|
| Albumin                         | 5 g/L                              | <i>Pichia pastoris</i>                     | P02768                   | ALBU_HUMAN               | IPI00745872<br>IPI00384697                               |
| Fibrinogen, $\alpha$ subunit    | 2 g/L*                             | human plasma                               | P02671                   | FIBA_HUMAN               | IPI00021885<br>IPI00029717                               |
| Fibrinogen, $\beta$ subunit     |                                    |                                            | P02675                   | FIBB_HUMAN               | IPI00298497                                              |
| Fibrinogen, $\gamma$ subunit    |                                    |                                            | P02679                   | FIBG_HUMAN               | IPI00021891<br>IPI00219713                               |
| Transferrin                     | 1 g/L                              | human plasma                               | P02787                   | TRFE_HUMAN               | IPI00022463                                              |
| Beta-2-microglobulin            | 2 mg/L                             | <i>E. Coli</i>                             | P61769                   | B2MG_HUMAN               | IPI00004656                                              |
| C-reactive protein              | 1 mg/L                             | <i>E. Coli</i>                             | P02741                   | CRP_HUMAN                | IPI00022389<br>IPI00218876                               |
| Gastrin-17 <sup>a</sup>         | 0.5 mg/L                           | peptide synthesis                          | P01350                   | GAST_HUMAN               | IPI00001624                                              |
| Transferrin receptor            | 500 $\mu$ g/L                      | human placental tissue                     | P02786                   | TFR1_HUMAN               | IPI00022462                                              |
| VEGF                            | 50 $\mu$ g/L                       | Sf21 clone of <i>Spodoptera frugiperda</i> | P15692                   | VEGFA_HUMAN              | IPI00852889<br>IPI00216555<br>IPI00872936<br>IPI00607893 |
| IGF-1                           | 100 $\mu$ g/L                      | <i>E. Coli</i>                             | P01343                   | IGF1A_HUMAN              | IPI00001610                                              |
| Prolactin                       | 20 $\mu$ g/L                       | <i>E. Coli</i>                             | P01236                   | PRL_HUMAN                | IPI00873653                                              |
| Alpha fetoprotein               | 15 $\mu$ g/L                       | human AFP cell line                        | P02771                   | FETA_HUMAN               | IPI00022443                                              |
| CEA                             | 10 $\mu$ g/L                       | Sf9 clone of <i>Spodoptera frugiperda</i>  | P06731                   | CEAM5_HUMAN              | IPI00027486                                              |
| Calcitonin <sup>b</sup>         | 10 $\mu$ g/L                       | peptide synthesis                          | P01258                   | CALC_HUMAN               | IPI00000914<br>IPI00215863                               |
| PSA                             | 5 $\mu$ g/L*                       | human seminal fluid                        | P07288                   | KLK3_HUMAN               | IPI00010858                                              |
| ACT                             |                                    | human plasma                               | P01011                   | AACT_HUMAN               | IPI00847635<br>IPI00607870                               |
| Thyroglobulin                   | 1 $\mu$ g/L                        | human thyroid                              | P01266                   | THYG_HUMAN               | IPI00306129<br>IPI00549199                               |
| GM-CSF                          | 50 ng/L                            | <i>E. Coli</i>                             | P04141                   | CSF2_HUMAN               | IPI00022270                                              |
| Tumor necrosis factor- $\alpha$ | 25 ng/L                            | <i>E. Coli</i>                             | P01375                   | TNFA_HUMAN               | IPI00001671                                              |
| Interleukin-2                   | 50 ng/L                            | <i>E. Coli</i>                             | P60568                   | IL2_HUMAN                | IPI00003099                                              |
| Interleukin-6                   | 5 ng/L                             | <i>E. Coli</i>                             | P05231                   | IL6_HUMAN                | IPI00007793                                              |
| Erythropoietin                  | 5 IU/L                             | Chinese Hamster Ovary cells                | P01588                   | EPO_HUMAN                | IPI00307226                                              |

\* Total mass concentration for the protein complex.

<sup>a</sup> Gastrin-17: 17 amino acid subsequence, 76-92, ("little gastrin" or simply gastrin) of GAST\_HUMAN, QGPWLEEEEEAYGWMDF

<sup>b</sup> Calcitonin: 32 amino acid subsequence, 85-116, of CALC\_HUMAN, CGNLSTCMLGTYTQDFNKFHTFPQTAIGVGAP

**Table 2: SOP Comparison Chart**

|                                             | <b>Study 2<br/>SOP v1.0</b> | <b>Study 3<br/>SOP v2.0</b> | <b>Study 5<br/>SOP v2.1</b> | <b>Study 6<br/>SOP v2.2</b> |
|---------------------------------------------|-----------------------------|-----------------------------|-----------------------------|-----------------------------|
| <b>Source/APstack parameters</b>            |                             |                             |                             |                             |
| Capillary temperature                       | NS <sup>a</sup>             | NS                          | 150 ± 25°C                  | 150 ± 25°C                  |
| Capillary voltage                           | NS                          | NS                          | 48 ± 20 V                   | 48 ± 20 V                   |
| Tube Lens                                   | NS                          | NS                          | 100 ± 25 V                  | 100 ± 25 V                  |
| Source voltage                              | NS                          | NS                          | 2.0 ± 0.5 kV                | 2.0 ± 0.5 kV                |
| <b>Tune File Parameters</b>                 |                             |                             |                             |                             |
| FTMS Full Microscans (Orbitrap only)        | 1                           | 1                           | 1                           | 1                           |
| Ion Trap MSn Microscans                     | 2                           | 1                           | 1                           | 1                           |
| FTMS Full Max Ion Time (Orbitrap only)      | 1000                        | 1000                        | 1000                        | 1000                        |
| Ion Trap Full Max Ion Time (LTQ only)       | 100                         | 100                         | 100                         | 100                         |
| Ion Trap MSn Max Ion Time                   | 100                         | 100                         | 100                         | 100                         |
| FTMS Full AGC Target (Orbitrap only)        | 1,000,000                   | 1,000,000                   | 1,000,000                   | 1,000,000                   |
| Ion Trap MSn AGC Target (Orbitrap only)     | 30,000                      | 10,000                      | 10,000                      | 10,000                      |
| Ion Trap MSn AGC Target (LTQ only)          | 10,000                      | 10,000                      | 10,000                      | 10,000                      |
| <b>MS detector</b>                          |                             |                             |                             |                             |
| Acquire time (min)                          | 135                         | 184                         | 184                         | 184                         |
| Start delay (min)                           | 0                           | 15                          | 15                          | 15                          |
| Segments                                    | 1                           | 1                           | 1                           | 1                           |
| Scan Events                                 | 9                           | 9                           | 9                           | 9                           |
| Scan Range for Event 1                      | m/z 300-2000                | m/z 300-2000                | m/z 300-2000                | m/z 300-2000                |
| Mass range for all events                   | Normal                      | Normal                      | Normal                      | Normal                      |
| Scan Rate for all events                    | Normal                      | Normal                      | Normal                      | Normal                      |
| Polarity for all events                     | Positive                    | Positive                    | Positive                    | Positive                    |
| Data type for MS scan (Orbitrap)            | Profile                     | Profile                     | Profile                     | Profile                     |
| Data type for MS scan (LTQ)                 | Centroid                    | Centroid                    | Centroid                    | Centroid                    |
| Data Type for MSn Scan                      | Centroid                    | Centroid                    | Centroid                    | Centroid                    |
| Additional microscans                       | 0                           | 0                           | 0                           | 0                           |
| Resolution of MS scan (Orbitrap only)       | 60,000                      | 60,000                      | 60,000                      | 60,000                      |
| Lock mass is NOT enabled (Orbitrap only)    | NS                          | NS                          | T <sup>b</sup>              | T                           |
| <b>Dynamic Exclusion</b>                    |                             |                             |                             |                             |
| Repeat Count                                | 1                           | 1                           | 1                           | 1                           |
| Repeat duration (s)                         | 0                           | 0                           | 0                           | 0                           |
| Exclusion list size                         | 500                         | 150                         | 150                         | 150                         |
| Exclusion duration (s)                      | 30                          | 60                          | 60                          | 60                          |
| Exclusion mass width                        | By mass                     | By mass                     | By mass                     | By mass                     |
| Exclusion mass width (low) (Orbitrap only)  | - 15 ppm                    | 0.6                         | 0.6                         | 0.6                         |
| Exclusion mass width (high) (Orbitrap only) | + 20ppm                     | 0.6                         | 0.6                         | 0.6                         |
| Exclusion mass width (low) (LTQ only)       | 1                           | 1                           | 1                           | 1                           |
| Exclusion mass width (high) (LTQ only)      | 3.5                         | 3.5                         | 3.5                         | 3.5                         |
| Early expiration is NOT used                | T                           | T                           | T                           | T                           |

|                                                                                                       | <b>Study 2<br/>SOP v1.0</b>            | <b>Study 3<br/>SOP v2.0</b>            | <b>Study 5<br/>SOP v2.1</b>            | <b>Study 6<br/>SOP v2.2</b>            |
|-------------------------------------------------------------------------------------------------------|----------------------------------------|----------------------------------------|----------------------------------------|----------------------------------------|
| <b>Global Data-Dependent Settings</b>                                                                 |                                        |                                        |                                        |                                        |
| Charge state screening enabled (Orbitrap only)                                                        | T                                      | T                                      | T                                      | T                                      |
| Monoisotopic precursor selection enabled (Orbitrap only)                                              | T                                      | T                                      | T                                      | T                                      |
| Non-peptide monoisotopic recognition enabled (Orbitrap only)                                          | NS                                     | T                                      | T                                      | T                                      |
| Charge state +1 rejected (Orbitrap only)                                                              | NS                                     | T                                      | T                                      | T                                      |
| Unassigned charge state rejected (Orbitrap only)                                                      | NS                                     | T                                      | T                                      | T                                      |
| <b>Scan Event</b>                                                                                     |                                        |                                        |                                        |                                        |
| Minimum MS signal Threshold for MS2 trigger                                                           | 500                                    | 500                                    | 500                                    | 500                                    |
| Mass determined from scan event                                                                       | 1                                      | 1                                      | 1                                      | 1                                      |
| Activation type                                                                                       | CID                                    | CID                                    | CID                                    | CID                                    |
| Default charge state                                                                                  | 4                                      | 4                                      | 4                                      | 4                                      |
| Isolation width (m/z)                                                                                 | 2                                      | 2                                      | 2                                      | 2                                      |
| Normalized collision energy                                                                           | 28                                     | 28                                     | 28                                     | 28                                     |
| Activation Q                                                                                          | 0.25                                   | 0.25                                   | 0.25                                   | 0.25                                   |
| Activation time (s)                                                                                   | 30                                     | 30                                     | 30                                     | 30                                     |
| Mass lists and global mass lists NOT used                                                             | T                                      | T                                      | T                                      | T                                      |
| Wideband Activation NOT used                                                                          | Specified for LTQ only                 | Specified for LTQ only                 | NS                                     | T                                      |
| Zoom scans NOT used (LTQ only)                                                                        | T                                      | T                                      | NS                                     | NS                                     |
| For each Current Scan Event, the Nth most intense ion is set at 8-1 for scan events 2-9, respectively | T                                      | T                                      | T                                      | T                                      |
| <b>HPLC Parameters and chromatography</b>                                                             |                                        |                                        |                                        |                                        |
| Autosampler temperature                                                                               | 10°C                                   | 10°C                                   | 10°C                                   | 10°C                                   |
| Column dimensions                                                                                     | NS <sup>c</sup>                        | 11-13 cm x 100µm <sup>d</sup>          | 11-13 cm x 100µm <sup>e</sup>          | 11-13 cm x 100µm <sup>e</sup>          |
| Precolumn dimensions                                                                                  | NS                                     | 2-4 cm x 100 µm <sup>e</sup>           | 2-4 cm x 100 µm <sup>f</sup>           | 2-4 cm x 100 µm <sup>f</sup>           |
| Column packing material                                                                               | C18 reversed phase <sup>g</sup>        | Jupiter C18 <sup>g</sup>               | Jupiter C18 <sup>g</sup>               | Jupiter C18 <sup>g</sup>               |
| Column temperature                                                                                    | 35 °C (if possible)                    | Room temperature                       | Room temperature                       | Room temperature                       |
| Mobile phase A                                                                                        | 0.1% (v/v) formic acid in water        |
| Mobile phase B                                                                                        | 0.1% (v/v) formic acid in acetonitrile |
| Injection volume                                                                                      | 2.0 µL <sup>h</sup>                    | 2.0 µL                                 | 2.0 µL                                 | 2.0 µL                                 |
| Injection loop (or needle) volume                                                                     | NS                                     | NS                                     | 8.0 µL <sup>i</sup>                    | 8.0 µL                                 |
| Flow rate for gradient                                                                                | As per individual lab protocol         | 600 +/- 200 nL/min at column tip       | 600 +/- 200 nL/min at column tip       | 600 nL/min at column tip               |
| Flow rate for loading phase                                                                           | N/A <sup>i</sup>                       | As per individual lab protocol         | As per individual lab protocol         | 1.2 µL/min                             |
| Gradient used for blanks                                                                              | Gradient 1                             | Gradient 2                             | Gradient 3                             | Gradient 3                             |
| Gradient used for NCI20                                                                               | Gradient 1                             | Gradient 2                             | Gradient 3                             | Gradient 3                             |
| Gradient used for yeast samples                                                                       | N/A                                    | Gradient 2                             | Gradient 2                             | Gradient 2                             |
| Specified column packing procedure?                                                                   | no                                     | yes <sup>k</sup>                       | yes                                    | yes                                    |

<sup>a</sup>NS = Not specified

<sup>b</sup>T = True

<sup>c</sup>Column dimensions were not specified in Study 2, but the concentration to be injected was to adjusted according to the size of chromatography column that was used.

<sup>d</sup>The following comment was added with respect to this parameter in the SOP for Study 2: "Participants will adhere as closely to these guidelines as possible with the understanding that not all labs are able to utilize a precolumn and depending upon their nanospray set up, these chromatographic dimensions may change somewhat. Derivations from the protocol in this regard will be recorded. All participants should use the Jupiter C18 resin sent to their respective labs."

<sup>e</sup>The following comment was added with respect to this parameter in the SOP for Studies 5 & 6: "Column length may vary depending upon the individual nanospray set up, but inner diameter should remain the same."

<sup>f</sup>The following comment was added with respect to this parameter in the SOP for Studies 5 & 6: "Precolumn is optional depending upon individual laboratory expertise, but should be used if at all possible. Column length may vary depending upon the individual nanospray set up, but inner diameter should remain the same."

<sup>g</sup>The exact type of C18 resin was not specified in Study 2. For Studies 3, 5 & 6, all labs were sent the resin from the same lot of Phenomenex Jupiter C18 resin (5 micron, 300 angstrom).

<sup>h</sup>Concentration of injected volume for Study 2 was adjusted according to diameter of chromatographic column.

<sup>i</sup>Since the design of the Agilent autosampler that was used by several groups in these studies has an 8µL needle for injection that was not interchangeable, other autosamplers attempted to conform by standardizing the injection loop size to 8 µL.

<sup>j</sup>N/A = Not applicable

<sup>k</sup>Column packing procedures were specified in the SOP for Studies 3, 5, &6 and the following comment was added: "If possible, participants should pack their columns at 1000 PSI in methanol and then finish packing with the HPLC at 50:50 0.1% formic : acetonitrile on the HPLC for 30 min prior to cutting back the columns to their final dimensions. Please note any discrepancies from this procedure. The column should also be conditioned prior to use with an injection of a concentrated protein digest (such as a BSA digest) followed by several injections of a less concentrated digest. Several blank runs should be performed after conditioning to eliminate carryover of the conditioning digest into the first blank of the study."

## Gradient 1

Mobile phase A = 0.1 % (v/v) formic acid in water

Mobile phase B = 0.1 % (v/v) formic acid in acetonitrile

HPLC Gradient:

| Time, min | % A | % B |
|-----------|-----|-----|
| 0         | 97  | 3   |
| 5         | 97  | 3   |
| 100       | 60  | 40  |
| 105       | 5   | 95  |
| 108       | 5   | 95  |
| 113       | 97  | 3   |
| 135       | 97  | 3   |

## Gradient 2

Mobile phase A = 0.1 % (v/v) formic acid in water

Mobile phase B = 0.1 % (v/v) formic acid in acetonitrile

HPLC Gradient:

| Time  | %A  | %B | Flow      |
|-------|-----|----|-----------|
| 0     | 100 | 0  | To Waste* |
| 0.01  | 100 | 0  | To Waste  |
| 10    | 100 | 0  | To Waste  |
| 15    | 98  | 2  | To Waste  |
| 15.01 | 98  | 2  | To column |
| 135   | 60  | 40 | To column |
| 150   | 10  | 90 | To column |
| 155   | 10  | 90 | To column |
| 159   | 10  | 90 | To column |
| 164   | 95  | 5  | To column |
| 169   | 100 | 0  | To column |
| 184   | 100 | 0  | To column |

\*If using a precolumn, the flow should be directed to waste.

### Gradient 3

Mobile phase A = 0.1 % (v/v) formic acid in water

Mobile phase B = 0.1 % (v/v) formic acid in acetonitrile

HPLC Gradient:

| Time  | %A  | %B | Flow      |
|-------|-----|----|-----------|
| 0     | 100 | 0  | To Waste* |
| 0.01  | 100 | 0  | To Waste  |
| 10    | 100 | 0  | To Waste  |
| 15    | 98  | 2  | To Waste  |
| 15.01 | 98  | 2  | To column |
| 50    | 75  | 25 | To column |
| 65    | 10  | 90 | To column |
| 70    | 10  | 90 | To column |
| 74    | 10  | 90 | To column |
| 75    | 95  | 5  | To column |
| 80    | 100 | 0  | To column |
| 95    | 100 | 0  | To column |

\*If using a precolumn, the flow should be directed to waste.



## Study 1 Experimental Plan

### Introduction

This document describes the initial to be conducted by Clinical Proteomics Technology Assessment for Cancer (CPTAC) teams. The overall goals of this experiment are to benchmark and begin to evaluate the capabilities of three major components of proteomic measurement methods (sample preparation, instrumentation, and data analysis), to identify of variability, and to identify peptides and proteins in a protein mixture.

The strength of this experiment resides in the team-oriented approach underlying the structure of the study. Every sample will be analyzed on many different platforms and by different laboratories. Data will be compared across labs to ensure repeatability and reproducibility. Consequently, complete and accurate reporting using commonly accepted formatting and terminology of all the requested data and metadata is imperative for the success of this study.

Given their experience in metrology and measurement quality assessment materials, the National Cancer Institute (NCI) is partnering with the National Institute of Standards and Technology (NIST) in overseeing this experiment. NIST is developing the materials and will store and analyze the data resulting from the interlab studies.

Also partnering with the NCI is Texas A&M University (TAMU). TAMU brings expertise in statistical design of experiments, which complements that of each group. Both TAMU and NIST have been working with the NCI to develop an experimental design for the initial experiment. Future experiments will also involve input from the five CPTAC teams.

### Experimental Timeline

#### STUDY I: "Benchmark Study of Defined Mixtures"

##### Experiment

##### **Week 1: November 6, 2006**

- NCI CPTAC Sample Type 1A and Sample Type 1B distributed to the CPTAC teams by NIST
- Raw data shall be submitted to NIST no later than November 13, 2006
- Processed data shall be submitted to NIST no later than November 20, 2006

##### **Week 2: November 13, 2006**

- NCI CPTAC Sample Type 1A and Sample Type 1B distributed to CPTAC teams by NIST
- Raw data shall be submitted to NIST no later than November 20, 2006
- Processed data shall be submitted to NIST no later than December 1, 2006

## Data Analysis

### **December 4–15, 2006**

- NCI, NIST, Texas A&M, and CPTAC teams conduct data analysis to identify variations within and between laboratories and instruments

### **December 18, 2006**

- CPTAC teleconference to present data and discuss results

## **Procedural Instructions**

### **STUDY IA: “Benchmark Study of Protein Mixtures”**

#### Goals

- to benchmark the starting performances of proteomic measurement methods
- to provide results to aid in the planning of subsequent studies
- to establish working protocols for transferring data between CPTAC teams and NCI/NIST/TAMU, including data format issues
- to detect platforms that have some difficulties attaining repeatability
- to find platforms that have similar performance characteristics
- to establish stable protein materials that may be later used as standards and to establish material and data transfer protocols

#### Description

- Teams may use their chosen methods to discern the composition of an unknown protein mixture (NCI CPTAC Sample Type 1A). These results will be used to identify the variables involved in identifying proteins in a complex mixture and will provide valuable information to the Program Coordinating Committee. The mixture is simple enough that a 1-D LC separation of the peptides derived from proteolysis of the protein mixture should provide sufficient resolution.
- NCI CPTAC Sample Type 1A consists of a mixture of proteins, supplied as a solution in an aqueous buffer. The concentrations of the proteins in a Sample Type 1A span the range of proteins found in human plasma, and the total protein concentration is approximately 8 g/L. The mixture was prepared in 25 mM phosphate buffered saline, pH 7.4, containing 5 mM sodium azide.
- Samples will be shipped frozen, in screw-capped 0.5 mL polypropylene vials, filled with approximately 0.1 mL of each sample.

### **Instructions for Week 1 (November 6 - 13, 2006)**

#### **Sample prep and measurement**

1. On November 7, 2006, receive three aliquots of NCI CPTAC Sample Type 1A per proteomic platform to be used in these studies.
2. Prepare each aliquot according to the individual laboratory's specified operating procedures, as reported in the survey (see 5 below if changes are necessary).
3. Analyze each aliquot on each proteomic platform described in the questionnaire (see 5 below if differences are necessary).
4. Analyze data to identify proteins in NCI CPTAC Sample Type 1A.
5. Record any deviations from standard operating procedures, and include any information needed to interpret results.
6. If Step 2 does not include trypsin digestion, repeat Steps 1–5 with trypsin digestion.

#### **Data analysis and reporting**

1. The name of each data file must contain the identification number of the aliquot from which it was generated.
2. By Monday, November 13, 2006, send raw MS data files for each aliquot to NIST.
3. By Monday, November 20, 2006, send to NIST MS peak lists, search engine results, and a summary report for each aliquot, including output data files created by library search software.
4. In the summary report, please include:
  - a. Proteins (including isoforms) and peptide ions identified, PTMs, and their numbers as well as confidence measures.
  - b. Methods for separating true and false positives.

### **Instructions for Weeks 2 (November 13-20, 2006)**

Instructions for Week 2 are identical to those for Week 1 except for the dates.

As much as possible, staff involved in the sample preparation and analysis should remain the same through both weeks.

#### **Sample prep and measurement**

1. All three aliquots should be run within 24 hours of receipt.

#### **Data analysis and reporting**

1. All three raw MS data files should be sent to NIST by Monday, November 20, 2006.
2. All processed data files should be sent to NIST by December 1, 2006

## **STUDY IB: “Benchmark Study of Digested Protein Mixtures”**

### **Goals (in addition to those from IA)**

- Benchmark performance of proteomic methods with a digested sample
- Determine the extent of variability arising from instrumentation
- Determine the extent of variability arising from data analysis

### **Description**

- This study is designed to control for differences in sample preparation. Each team will receive aliquots of a protein mixture (NCI CPTAC Sample Type 1B) that have already been digested by trypsin. The aliquots will be run and analyzed as they were in Study IA, except for the sample preparation steps. This is the first step toward isolating the source of variability in proteomics experiments.
- NCI CPTAC Sample Type 1B will be peptides resulting from the reduction, cysteine-alkylation, and trypsin digestion of the proteins in Sample Type 1A by NIST. The reduction, alkylation, and trypsin digestion of Sample Type 1A will involve minimal dilution and, therefore, the molar concentration of the peptides in Sample Type 1B will be similar to the molar concentration of the proteins in Sample Type 1A.
- Samples will be shipped frozen, in screw-capped 0.5 mL polypropylene vials, filled with approximately 0.1 mL of each sample.

### **Instructions for Week 1 (November 6-13, 2006)**

#### **Sample prep and measurement**

1. On November 7, 2006, receive three aliquots of NCI CPTAC Sample Type 1B per proteomic platform in laboratory.
2. Analysis each aliquot using the proteomic platform.
3. Process and analyze data to identify proteins in NCI CPTAC Sample Type 1B.
4. Record any deviations from laboratory standard operating procedure

#### **Data analysis and reporting**

1. The name of each data file must contain the identification number of the aliquot from which it was generated.
2. By Monday, November 13, 2006, send raw MS data files for each aliquot to NIST.
3. By Monday, November 20, 2006, send to NIST MS peak lists, search engine results, and a final protein report for each aliquot.
4. In the protein report, please include:
  - a. Proteins (including isoforms) and peptide ions identified, PTMs, and their numbers as well as confidence measures.
  - b. Methods for separating true and false positives.

### **Instructions for Week 2 (November 13–20, 2006)**

Instructions for Week 2 are identical to those for Week 1 except for the dates. Below are the relevant instructions to keep up with the CPTAC timeline.

#### **Sample prep and measurement**

1. All three aliquots should be run within 24 hours of receipt.

#### **Data analysis and reporting**

1. All three raw MS data files should be sent to NIST by Monday, November 20, 2006.
2. All processed data files should be sent to NIST by December 1, 2006

## Study 2 Experimental Plan: SOP v1.0

### SOP for CPTAC Study 2

This standard operating procedure (SOP) is intended to provide a more uniform LC-MS/MS measurement of a peptide mixture (Sample 1B) between different labs all using a Thermo LTQ or LTQ-Orbitrap. This SOP is intended to provide a common and reasonable set of experimental parameters for this inter-laboratory study, so is not necessarily optimal for each laboratory.

Because different LC-MS/MS instrument configurations will be used in this study, the SOP is intended to be flexible enough to accommodate this variety. Therefore, please note that LC column dimensions, flow rates, and the ESI source type and source parameters are not given. These are to be decided by the individual labs.

The analysis of data will be done in the same way as done for Study 1, using the NIST peptide identification pipeline described earlier. A password-protected web-based data entry form will be provided to permit filling in experimental details not fixed by the SOP. In this form, locations for copying the resulting raw data files will also be provided. As before, uploading will be to a NIST sFTP site.

#### Sample Handling:

- a. NCI Sample 1B (two sets of 3 vials) should be stored at -80 °C
- b. Prior to analysis, thaw samples to room temperature for 1-2 h.
- c. Mix samples thoroughly by vortexing
- d. Spin samples down briefly by centrifuging (2 min at 5000 rpm)
- e. **If necessary (see table below), dilute each of the 3 samples with HPLC- or MS-grade water, mix thoroughly and transfer an aliquot to an autosampler vial. Use only one aliquot from each vial of Sample 1B and not multiple aliquots from the same vial.**

| HPLC column diameter to be used... | Dilution of Sample 1B performed... |
|------------------------------------|------------------------------------|
| 2.1 mm                             | none (undiluted)                   |
| 1 mm                               | 3-fold                             |
| 320 µm                             | 30-fold                            |
| 150 µm                             | 150-fold                           |

- f. Prepare a blank by adding HPLC- or MS-grade water to an additional autosampler vial

#### HPLC Parameters:

Autosampler temperature= 10 °C

Column type = C18 reversed phase column

Column temperature = 35 °C **when possible, otherwise room temperature**

Mobile phase A = 0.1 % (v/v) formic acid in water

Mobile phase B = 0.1 % (v/v) formic acid in acetonitrile

Injection volume = **2.0 µL**

HPLC Gradient:

| <b>Time, min</b> | <b>% A</b> | <b>% B</b> |
|------------------|------------|------------|
| 0                | <b>97</b>  | <b>3</b>   |
| 5                | <b>97</b>  | <b>3</b>   |
| 100              | 60         | 40         |
| 105              | 5          | 95         |
| 108              | 5          | 95         |
| 113              | <b>97</b>  | <b>3</b>   |
| 135              | <b>97</b>  | <b>3</b>   |

**MS Parameters:**

- The MS parameters below reflect those of a Thermo LTQ with the following software versions: Xcalibur 2.0 SR2 and LTQ MS 2.2
- Electrospray source parameters will be dictated by the LC flowrate and type of source used and the value for source parameters are left to the operator to decide what is appropriate
- The LTQ parameters below reflect a data dependent MS/MS experiment where one MS scan is followed by 8 MS/MS scans on the most intense ions, **in the order of least intense to most intense**
- User defined settings are summarized in the tables below, but default values should be used when a value is not specified

### Tune Plus

|                            | LTQ    | LTQ-Orbitrap     |
|----------------------------|--------|------------------|
| Full microscans            | 1      | 1                |
| MS <sup>n</sup> microscans | 2      | 2                |
| Full Max Ion Time (ms)     | 100    | <b>1000</b>      |
| MSn Max Ion Time (ms)      | 100    | 100              |
| Full AGC Target            | 30,000 | <b>1,000,000</b> |
| MS <sup>n</sup> AGC Target | 10,000 | <b>30,000</b>    |

### MS Detector

|                                    | LTQ          | LTQ-Orbitrap |
|------------------------------------|--------------|--------------|
| Acquire time (min)                 | 135          | 135          |
| Start delay (min)                  | 0            | 0            |
| Segments                           | 1            | 1            |
| Scan Events                        | 9            | 9            |
| Scan Ranges for Event 1            | m/z 300-2000 | m/z 300-2000 |
| Mass Range for all Events          | Normal       | Normal       |
| Scan Rate for all Events           | Normal       | Normal       |
| Scan Type for Event 1              | Full         | Full         |
| Polarity for all Events            | Positive     | Positive     |
| Data type for MS Scan              | Centroid     | Profile      |
| Data type for MS <sup>n</sup> Scan | Centroid     | Centroid     |
| Additional microscans              | 0            | 0            |
| Resolution of MS scan              | —            | 60,000       |

- Zoom scans and wideband activation are not used for LTQ runs



For Scan Events 2-9, the Dependent Scan box is checked and the following settings are used:

### Dynamic Exclusion

|                             | LTQ     | LTQ-Orbitrap    |
|-----------------------------|---------|-----------------|
| Repeat count                | 1       | 1               |
| Repeat duration (s)         | 0       | 0               |
| Exclusion list size         | 500     | 500             |
| Exclusion duration (s)      | 30      | 30              |
| Exclusion mass width        | by mass | by mass         |
| Exclusion mass width (low)  | 1.0     | <b>- 15 ppm</b> |
| Exclusion mass width (high) | 3.5     | <b>+ 20 ppm</b> |

#### For the LTQ-Orbitrap:

- Charge State Screening is enabled
- Find C12 is turned on

#### For the LTQ:

- Charge State Screening and Rejection is not enabled

### Scan Event

|                                 | LTQ       | LTQ-Orbitrap |
|---------------------------------|-----------|--------------|
| MS2 Minimum signal threshold    | 500       | 500          |
| Mass determined from scan event | 1         | 1            |
| Activation type                 | CID       | CID          |
| Default charge state            | 4         | 4            |
| Isolation width (m/z)           | 2.0       | 2.0          |
| Normalized collision energy     | <b>28</b> | <b>28</b>    |
| Activation Q                    | 0.250     | 0.250        |
| Activation time (ms)            | 30.0      | 30.0         |

- For each Current Scan Event, the N<sup>th</sup> most intense ion is set at 8-1 for scan events 2-9, respectively
- Mass lists and global mass lists are not used
- Early expiration is not used

#### **LC-MS/MS Analysis:**

- a. Sample should be analyzed in the following order:
  1. blank
  2. Sample 1B, vial 1
  - 3. blank**
  4. Sample 1B, vial 2
  - 5. blank**
  6. Sample 1B, vial 3
- b. The second set of 3 vials of Sample 1B should be analyzed approximately one week after the first set, preferably after the instrument has been used for other analyses.

#### **Tracking Annotation:**

The purpose of the SOP is that all samples be run identically on each of the team's instruments. In the event of a deviation from the SOP, or to record parameters not explicitly listed in the SOP, NIST has set up a user-friendly website to record such deviations. This site will also serve to centralize and standardize collection of CPTAC sample analysis metadata with respect to the SOP. Metadata from all Study 2 runs shall be submitted to this site. Ideally, metadata should be submitted on the same day the sample is analyzed.

All teams are required to run three samples in Week 1 and three samples in Week 2. The week in which the sample was run is to be recorded for each sample on the website. One or more operating procedures (OP) must also be created for each team. This record stores the values actually used when the sample was run, and must be assigned to each group of samples on the day of analysis. This process constitutes annotation for this SOP based study, and the values will be used during analysis of results.

The site is located at: <http://chemdata.nist.gov/cptac/>

Each team was provided with a username and password for this site.

Instructions for using the site are linked on the site. Please direct questions or feedback to Dr. Paul Rudnick ([paul.rudnick@nist.gov](mailto:paul.rudnick@nist.gov)).

## Background Information:

A primary goal of NCI CPTAC Study 2 is to assess between-lab comparability on comparable instrument, specifically the Thermo LTQ or LTQ-Orbitrap. However, while the MS instrumentation might be comparable between labs, the LC inlets used are not, with probably the most critical differences being the LC column dimensions and the flow rates used.

Because MS is a concentration dependent analytical technique, column diameter and LC flow rate will have a pronounced effect on measurement sensitivity because, for a given amount of sample injected on-column, lower flowrates and smaller column dimensions result in a lower elution volume and higher elution concentration. It is believed that for a given amount of sample on-column, the MS measurement sensitivity relates to the LC column diameter through a  $\approx 1/r^2$  factor, where  $r$  is the radius of the column.

Therefore, in order to provide the most comparable results from different LC set-ups, we propose varying the amount injected on-column based on the dimensions of the LC column used through a  $1/r^2$  scaling factor.

First, the calculations are based on the approximate total protein concentration used to prepare Sample B =  $4 \mu\text{g}/\mu\text{L} \approx 60 \text{ pmol}/\mu\text{L}$  (using the molecular mass of HSA, the most abundant protein in Sample B, as a representative protein mass).

The starting point for the calculations in the table below was the goal to perform a  $2 \mu\text{L}$  injection of 750 fmol on-column when using a column with an inside diameter of  $150 \mu\text{m}$  or smaller. On-column injection amounts were scaled up approximately, relative to the  $1/r^2$  factor, for columns of differing dimension. The dilution factor for NCI-20 Sample B was calculated based on keeping the injection volume for all column dimensions fixed at  $2 \mu\text{L}$ .

| Column ID                 | $\approx 1/r^2$ | Amount injected on-column | Concentration of Sample for $2 \mu\text{L}$ injection | NCI-20 Sample B Dilution |
|---------------------------|-----------------|---------------------------|-------------------------------------------------------|--------------------------|
| 2.1 mm                    | 1               | 150,000 fmol              | 75,000 fmol/ $\mu\text{L}$                            | undiluted                |
| 1 mm                      | 4               | 37,500 fmol               | 18,750 fmol/ $\mu\text{L}$                            | 3-fold                   |
| 320 $\mu\text{m}$         | 40              | 3,750 fmol                | 1,875 fmol/ $\mu\text{L}$                             | 30-fold                  |
| 150 $\mu\text{m}$ + below | 200             | <b>750 fmol</b>           | 375 fmol/ $\mu\text{L}$                               | 150-fold                 |

## Study 3 Experimental Plan: SOP v2.0

[Note: Study 3 was originally intended as a “dress rehearsal” for Study 3. The group later renamed this test experiment to be Study 3.]

### Proposed SOP for Dress Rehearsal of CPTAC Study 3 (Yeast)

The CPTAC Unbiased Discovery Working Group was tasked to design a renewable, standardized set of reference samples for benchmarking LC-MS/MS platforms with respect to performance characteristics relevant to shotgun proteomics-based biomarker discovery. The first CPTAC-wide experiment of this working group will be to test a yeast lysate spiked with a human protein mix. If successful, the spiked sample will provide a means for comparing performance of LC/MS/MS platforms i) as a quality control over time, ii) after the addition of new technologies to evaluate their effectiveness compared to historic data, or iii) between laboratories to inform optimization and troubleshooting.

The experiment has been designed to meet two primary goals. First, the study will provide an assessment of run-to-run and lab-to-lab variability for a complex mixture of proteins. Also, the study will provide a measure of the sensitivity of a mass-spec platform in a yeast lysate. This will be achieved by calculating the power required to detect a twofold difference for the overall sensitivity of the platform for a given decade of protein abundance.

This proposed standard operating procedure (SOP) was developed after initial testing of several yeast lysate samples at Vanderbilt University. Three major areas of potential optimization were tested, 1) digestion conditions, 2) chromatography and 3) mass spectrometric parameters. The development of this SOP involved the use of either a Thermo LTQ or a Thermo LTQ-Orbitrap instrument. In contrast to procedures for prior CPTAC Studies, this SOP has been optimized for high sensitivity. We have prioritized peptide diversity and high protein counts over the reproducible identification of a core set of peptides or proteins.

This study will be carried out in two phases. The first phase—the “dress rehearsal”—will be carried out with a digested, unspiked yeast lysate sample and be used to fine tune this SOP and sort through any issues of data handling and analysis. The second phase will be the full study with four digested yeast samples, each spiked with varying amounts of digested Sigma-48 proteins.

This is the SOP for the dress rehearsal. It describes the samples, specifies settings for sample preparation and analysis, and provides instructions for submitting and annotating the data. Finally, the sample scheme and schedule for the dress rehearsal conclude the document.

#### Study Samples:

The yeast lysate and Sigma-48 was digested using RapiGest as denaturant and iodoacetamide as alkylating reagent. A 20 h digest was performed at 37 °C with proteomics-grade trypsin. After digestion, both samples were lyophilized and resuspended in 0.1% formic acid in water. The yeast sample has been diluted to a total protein concentration of 60 ng/μL. Therefore, the yeast sample is ready to be analyzed without additional dilution. The yeast sample (Sample 3-A) contains approximately 100 μL.

Table 1 contains descriptive and concentration information on the study samples:

| <b>Table 1<br/>Sample</b> | <b>NCI CPTAC Study 3 dress rehearsal samples<br/>Description</b> | <b>[Total Yeast<br/>Protein]</b> | <b>[Individual<br/>Sigma-48]</b> |
|---------------------------|------------------------------------------------------------------|----------------------------------|----------------------------------|
| Sample 3-A                | unspiked digested yeast                                          | 60 ng/ $\mu$ L                   | 0                                |
| Sample 1-B                | digested NCI-20 protein mix                                      | 0                                | 0                                |

For the “dress rehearsal” of Study 3, 1 vial of digested, unspiked yeast (Sample 3-A) was sent to study participants along with 1 vial of digested NCI-20 (Sample 1B), which will be used as a QC sample for the study. Prior to analysis, **Sample 1B should be diluted 150-fold with 0.1% formic acid in water.**

**HPLC Parameters:**

Autosampler temperature= 10 °C

Column type = 11 cm x 100  $\mu$ m Jupiter C18 reversed phase column with a 2 cm x 100  $\mu$ m “vented” precolumn with same packing material

Column temperature = room temperature

Mobile phase A = 0.1 % (v/v) formic acid in water

Mobile phase B = 0.1 % (v/v) formic acid in acetonitrile

Injection volume = **2.0  $\mu$ L**

Flow-rate = 600 +/- 200 nL/min at column tip

Participants will adhere as closely to these guidelines as possible with the understanding that not all labs are able to utilize a precolumn and depending upon their nanospray set up, these chromatographic dimensions may change somewhat. Derivations from the protocol in this regard will be recorded. All participants should use the Jupiter C18 resin sent to their respective labs.

If possible, participants should pack their columns at 1000 PSI in methanol and then finish packing with the HPLC at 50:50 0.1%formic:acetonitrile on the HPLC for 30min prior to cutting back the columns to their final dimensions. Please note any discrepancies from this procedure. The column should also be conditioned prior to use with an injection of a concentrated protein digest (such as a BSA digest) followed by several injections of a less concentrated digest. Several blank runs should be performed after conditioning to eliminate carryover of the conditioning digest into the first blank of the study.

Recommended HPLC gradient with “vented” column if possible (first 15 minutes diverted to waste if utilizing a “vented” column).

| Time  | A%  | B% |
|-------|-----|----|
| 0     | 100 | 0  |
| 0.01  | 100 | 0  |
| 10    | 100 | 0  |
| 15    | 98  | 2  |
| 15.01 | 98  | 2  |
| 135   | 60  | 40 |
| 150   | 10  | 90 |
| 155   | 10  | 90 |
| 159   | 10  | 90 |
| 164   | 95  | 5  |
| 169   | 100 | 0  |
| 184   | 100 | 0  |

**MS Parameters:**

- Parameters in **bold** are those that deviate from the SOP from the CPTAC Study 2
- The MS parameters below reflect those with the following software versions for the Thermo LTQ and LTQ-Orbitrap respectively: **Xcalibur 2.0 SR2, LTQ MS 2.2 and Xcalibur 2.0 SR2, FT programs 2.0.2 0614, LTQ Orbitrap MS 2.2**
- Electrospray source parameters will be dictated by the LC flowrate and type of source used and the value for source parameters are left to the operator to decide what is appropriate
- The LTQ parameters below reflect a data dependent MS/MS experiment where one MS scan is followed by 8 MS/MS scans on the most intense ions, in the order of least intense to most intense
- User defined settings are summarized in the tables below, but default values were used when a value is not specified

### Tune Plus

|                            | LTQ        | LTQ-Orbitrap  |
|----------------------------|------------|---------------|
| Full microscans            | 1          | 1             |
| MS <sup>n</sup> microscans | <b>1</b>   | <b>1</b>      |
| Full Max Ion Time (ms)     | 100        | 1000          |
| MSn Max Ion Time (ms)      | <b>100</b> | <b>100</b>    |
| Full AGC Target            | 30,000     | 1,000,000     |
| MS <sup>n</sup> AGC Target | 10,000     | <b>10,000</b> |

### MS Detector

|                                    | LTQ          | LTQ-Orbitrap |
|------------------------------------|--------------|--------------|
| Acquire time (min)                 | <b>184</b>   | <b>184</b>   |
| Start delay (min)                  | <b>15</b>    | <b>15</b>    |
| Segments                           | 1            | 1            |
| Scan Events                        | 9            | 9            |
| Scan Ranges for Event 1            | m/z 300-2000 | m/z 300-2000 |
| Mass Range for all Events          | Normal       | Normal       |
| Scan Rate for all Events           | Normal       | Normal       |
| Scan Type for Event 1              | Full         | Full         |
| Polarity for all Events            | Positive     | Positive     |
| Data type for MS Scan              | Centroid     | Profile      |
| Data type for MS <sup>n</sup> Scan | Centroid     | Centroid     |
| Additional microscans              | 0            | 0            |
| Resolution of MS scan              | —            | 60,000       |

- Zoom scans and wideband activation are not used for LTQ runs

For Scan Events 2-9, the Dependent Scan box is checked and the following settings are used:

### Dynamic Exclusion

|                             | LTQ        | LTQ-Orbitrap |
|-----------------------------|------------|--------------|
| Repeat count                | 1          | 1            |
| Repeat duration (s)         | 0          | 0            |
| Exclusion list size         | <b>150</b> | <b>150</b>   |
| Exclusion duration (s)      | <b>60</b>  | <b>60</b>    |
| Exclusion mass width        | by mass    | by mass      |
| Exclusion mass width (low)  | 1.0        | <b>0.6</b>   |
| Exclusion mass width (high) | 3.5        | <b>0.6</b>   |

#### For the LTQ-Orbitrap:

- **Charge State Screening is enabled**
- **Monoisotopic precursor selection enabled**
- **Non-peptide monoisotopic recognition enabled**
- **Charge state +1 rejected**
- **Unassigned charge state rejected**

#### For the LTQ:

- **Charge State Screening and Rejection is not enabled**



## Scan Event

|                                 | LIQ   | LIQ-Orbitrap |
|---------------------------------|-------|--------------|
| MS2 Minimum signal threshold    | 500   | 500          |
| Mass determined from scan event | 1     | 1            |
| Activation type                 | CID   | CID          |
| Default charge state            | 4     | 4            |
| Isolation width (m/z)           | 2.0   | 2.0          |
| Normalized collision energy     | 28    | 28           |
| Activation Q                    | 0.250 | 0.250        |
| Activation time (ms)            | 30.0  | 30.0         |

- For each Current Scan Event, the N<sup>th</sup> most intense ion is set at 8-1 for scan events 2-9, respectively
- Mass lists and global mass lists are not used
- Early expiration is not used

### Annotation / Data Transfer for Study3 “Dress Rehearsal”

A new CPTAC website is being developed for Study 3 that uses Tranche (<http://www.proteomecommons.org/dev/dfs/>) to store data files; annotation will be recorded using spreadsheets. Access to CPTAC data files will be restricted by passphrases stored in a database accessible by the website. The goal of this site is to collect valuable experimental information and connect it to the data. It also provides a means to record ‘lab-specific’ information not specified by the SOP along with any necessary deviations from the SOP so that this information may be systematically evaluated during the analysis phase of the study.

The CPTAC annotation website now provides the following services to participating teams: (1) secure team login and access to pre-loaded, lab/site-specific information, (2) access to annotation forms (xls), (3) a field to track SOP compliance, (4) direct upload links to Tranche, and (5) study-wide single and batch Tranche download access.

The following simplified illustration shows the current organization of data elements in the study and is based on a model developed by the ‘Data Analysis, Storage, and Dissemination Working Group’ (all depicted entity relationships are ‘1-to-many’):

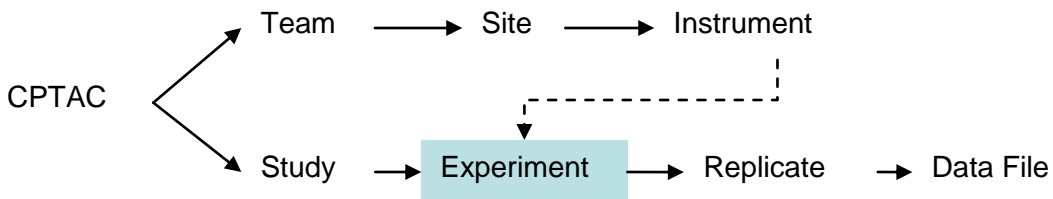

The database is designed to store multiple CPTAC studies, but only one study at a time is active. This phase of the Study will be loaded as an Experiment under each Instrument for each participating Team account. The current “dress rehearsal” phase will be run as a single replicate consisting of 13 runs. **Note:** The functions and layout of the site are subject to change during the course of the Study.

### Access and Annotation/Data Upload

The **new** URL for the site is:

<https://chemdata.nist.gov/cptac/>

[**Note:** This is a secure ‘https’ website. Although traffic on the site is encrypted, its certificate is not signed by a third party outside of NIST. This will prompt a security warning on most browsers and users should click ‘allow this site’ or similar message to proceed. The process of installing a security certificate is underway to eliminate these warnings.]

Users login using the name of the team lead in all lower case (i.e. ‘carr’, ‘fisher’, ‘liebler’, ‘regnier’ or ‘tempst’). Passwords will be e-mailed to data contacts and team leads at the beginning of the dress rehearsal. There is only one login password per team.

Current Study: **Study3**

CPTAC Team: *carr*

- Home -
- Download Data - ← Study data access
- CPTAC Intranet

---

**Broad** ← Site

2 Instrument(s)

- Broad-Orbi1 - ← Instrument
- Phase I: Dress Rehearsal ← Experiment
- Broad-LTQETD-1 -
- Phase I: Dress Rehearsal

---

**FHCRC**

1 Instrument(s)

- FHCRC-LTQ1 -
- Phase I: Dress Rehearsal

---

**ABI**

0 Instrument(s)

- Instructions
- Logout

Select from the navigation bar the experiment you wish to annotate and add data files.

The illustration above shows one team’s navigation bar following login. After selecting the appropriate “Phase I: Dress Rehearsal”, the annotation page will be displayed listing the steps for annotation and upload. All annotation and data files will be uploaded as a **single directory** to Tranche. Individual download of the same directory using Tranche will allow selection of individual files from a directory listing.

Follow these steps to annotate and upload study data. These (or similar) steps will appear on the website with links:

1. Download the annotation form.
2. Complete the annotation form. All required fields are highlighted. Use the ‘site’ and ‘instrument name’ provided on the website’s navigation bar to fill-in the top section. The middle section is specific to the entire “dress rehearsal” and information entered here is expected to stay consistent for all runs. The bottom section tracks individual run/file information. The sample name from the tube you were shipped must be entered for each study sample along with the date and raw file name. Comments specific to a single run can also be entered here.
3. Copy raw data file(s) from **each step** of the SOP (13 total sample/blank/wash runs) to a single directory. If you are using an instrument that generates multiple raw files per sample, please create a single zip file for each step.
4. If running an LTQ, copy your ‘tune’ and ‘method’ files used for the experiment into the same directory.
5. Copy your completed annotation form to this directory. The contents of your directory should look something like this prior to upload:

| Name                                                                                                                            | Type                       |
|---------------------------------------------------------------------------------------------------------------------------------|----------------------------|
|  broadltq1_study3_dr_run13_blank.RAW           | Xcalibur Raw File          |
|  broadltq1_study3_dr_run12_wash.RAW            | Xcalibur Raw File          |
|  broadltq1_study3_dr_run11_3A.RAW              | Xcalibur Raw File          |
|  broadltq1_study3_dr_run10_blank.RAW           | Xcalibur Raw File          |
|  broadltq1_study3_dr_run9_wash.RAW             | Xcalibur Raw File          |
|  broadltq1_study3_dr_run8_1B.RAW               | Xcalibur Raw File          |
|  broadltq1_study3_dr_run7_blank.RAW            | Xcalibur Raw File          |
|  broadltq1_study3_dr_run6_wash.RAW             | Xcalibur Raw File          |
|  broadltq1_study3_dr_run5_3A.RAW               | Xcalibur Raw File          |
|  broadltq1_study3_dr_run4_blank.RAW            | Xcalibur Raw File          |
|  broadltq1_study3_dr_run3_wash.RAW             | Xcalibur Raw File          |
|  broadltq1_study3_dr_run2_1B.RAW               | Xcalibur Raw File          |
|  broadltq1_study3_dr_run1_blank.RAW            | Xcalibur Raw File          |
|  broadltq1_study3_dr_method.meth               | Xcalibur Instrument Method |
|  broadltq1_dress_rehearsal_annotation_form.xls | Microsoft Excel Worksheet  |
|  broadltq1_study3_dr_tune.LTQTune              | LTQ Tune File              |

Ready to upload

- Verify that all parameters have been checked according to the SOP **or** that deviations have been otherwise recorded. Have the designated SOP authority at your site “sign” the web form by entering his/her name in the box. Should there be any deviations from the SOP or other questions regarding your lab’s operation of the experiment, the SOP authority will serve as the primary contact.
- Click on the ‘Upload Data’ link provided on the website. This will launch the CPTAC/Tranche upload tool. Select the directory to upload; the progress indicator will display the time left for the transfer; your browser does not have to remain open during this time. Your Tranche hash and passphrase will be recorded on the website after the upload has completed. These values will be used to later access your data.

### Data Downloading

After uploads have completed, all of the “dress rehearsal” data can be downloaded from the ‘Download Data’ link on the navigation bar. From this page, click on a single link or use the check boxes to generate a multiple download ‘csv’ file. This file can be used as input for a ‘multi-download’ used in combination with the latest Tranche Tool. More information on this feature can be found here, <http://www.proteomecommons.org/dev/dfs/examples/nci-cptac/>.

**Note:** A ‘multi-download’ csv file contains your Tranche hashes and passphrases and can be used by anyone to access your data files. You may keep this file as a “back-up” but **do not share** it with parties outside of the CPTAC program until this level of data sharing has been authorized.

### Sampling Scheme:

Samples should be analyzed in the following order:

Dress rehearsal:

1. blank (full gradient, injection of 0.1% formic acid in H<sub>2</sub>O(mobile phase A))
2. Sample 1B (QC sample, full gradient)
3. autosampler and column wash (per individual lab's protocol)
4. blank (full gradient, injection of 0.1% formic acid in H<sub>2</sub>O(mobile phase A))
5. Sample 3-A (digested, unspiked yeast)
6. autosampler and column wash (per individual lab's protocol)
7. blank (full gradient, injection of 0.1% formic acid in H<sub>2</sub>O(mobile phase A))
8. Sample 1B (QC sample, full gradient)
9. autosampler and column wash (per individual lab's protocol)
10. blank (full gradient, injection of 0.1% formic acid in H<sub>2</sub>O(mobile phase A))
11. Sample 3-A (digested, unspiked yeast)
12. autosampler and column wash (per individual lab's protocol)
13. blank (full gradient, injection of 0.1% formic acid in H<sub>2</sub>O(mobile phase A))

**Key Dates for Dress Rehearsal**

|                                                                                    | Time<br>allotted | Finish<br>date |
|------------------------------------------------------------------------------------|------------------|----------------|
| SOP and analysis scheme understood and approved by participating labs              | 4d               | 7/10/2007      |
| Labs perform dress rehearsal experiments                                           | 10d              | 7/20/2007      |
| Labs upload data to Tranche                                                        | 4d               | 7/24/2007      |
| Dress rehearsal data analyzed and issues with individual lab's data are sorted out | 20d              | 8/13/2007      |
| Troubleshoot dress rehearsal data and protocol                                     | 18d              | 8/31/2007      |
| Begin experiments on spiked yeast samples                                          |                  | 9/4/2007       |

## Study 5 Experimental Plan: SOP v2.1

### CPTAC Unbiased Discovery Working Group Study 5 SOP

The CPTAC Unbiased Discovery Working Group was tasked to design a renewable, standardized set of reference samples for benchmarking LC-MS/MS platforms with respect to performance characteristics relevant to shotgun proteomics-based biomarker discovery. The first CPTAC-wide experiment of this working group was to test a yeast lysate spiked with a human protein mix. Due to complications with the human protein mix that we were to use, we have modified this experiment to include only a single protein, bovine serum albumin (BSA). This initial spiked sample will provide a means for comparing performance of LC/MS/MS platforms amongst the CPTAC participants. In the future, our goal is to develop a performance standard that will provide a means for comparing performance of LC/MS/MS platforms i) as a quality control over time, ii) after the addition of new technologies to evaluate their effectiveness compared to historic data, or iii) between laboratories to inform optimization and troubleshooting.

The experiment has been designed to meet two primary goals. First, the study will provide an assessment of run-to-run and lab-to-lab variability for a complex mixture of proteins. Also, the study will provide a measure of the sensitivity of a mass-spec platform in a yeast lysate. This will be achieved by calculating the power required to detect a two-fold difference for the overall sensitivity of the platform for a given decade of protein abundance.

This proposed standard operating procedure (SOP) was developed after initial testing of several yeast lysate samples at Vanderbilt University. After an initial “dress rehearsal” run, the SOP was re-evaluated and refined to achieve better compliance as well as standardize new parameters that may have led to variance in the initial dress rehearsal runs.

#### **Study Samples:**

The yeast lysate and BSA was digested using RapiGest as denaturant and iodoacetamide as alkylating reagent. A 20 h digest was performed at 37 °C with proteomics-grade trypsin. After digestion, both samples were lyophilized and resuspended in 0.1% formic acid in water. The yeast sample has been diluted to a total protein concentration of 60 ng/μL. Therefore, the yeast samples are ready to be analyzed without additional dilution. Both yeast samples (Sample 3-A and 3-B) contains approximately 100 μL.

Table 1 contains descriptive and concentration information on the study samples:

**Table 2** NCI CPTAC Study 5 samples

| Sample     | Description                  | [Total Yeast Protein] | [BSA]            |
|------------|------------------------------|-----------------------|------------------|
| Sample 3-A | unspiked digested yeast      | 60 ng/ $\mu$ L        | 0                |
| Sample 3-B | BSA digest in digested yeast | 60 ng/ $\mu$ L        | 10 fmol/ $\mu$ L |
| Sample 1-B | digested NCI-20 protein mix  | 0                     | 0                |

For Study 5, 1 vial of digested, unspiked yeast (Sample 3-A) and 1 vial of digested yeast spiked with a BSA digest (Sample 3-B) was sent to study participants along with 1 vial of digested NCI-20 (Sample 1B), which will be used as a QC sample for the study. Prior to analysis, **Sample 1B should be diluted 150-fold with 0.1% formic acid in water.**

Below are checklists that outline the HPLC and mass spectrometry parameters of this SOP for both a Thermo LTQ and Thermo Orbitrap. The run order of samples follow the checklists. Participants will adhere as closely to these guidelines as possible with the understanding that not all labs are able to utilize a precolumn and, depending upon their nanospray set up, these chromatographic dimensions (length only) may change somewhat. Derivations from the protocol in this regard will be recorded. All participants should use the Jupiter C18 resin sent to their respective labs.

If possible, participants should pack their columns at 1000 PSI in methanol and then finish packing with the HPLC at 50:50 0.1% formic:acetonitrile on the HPLC for 30 min prior to cutting back the columns to their final dimensions. Please note any discrepancies from this procedure. The column should also be conditioned prior to use with an injection of a concentrated protein digest (such as a BSA digest) followed by several injections of a less concentrated digest. Several blank runs should be performed after conditioning to eliminate carryover of the conditioning digest into the first blank of the study.

It is recommended that each lab run a preliminary test run with the SOP methods and check the parameters recorded in the data file against the check lists provided. This will help to find errors in tune file parameters that can sometimes be tricky to spot.

| <b>LTQ SOP Checklist</b>  |                       |  |                           |       |
|---------------------------|-----------------------|--|---------------------------|-------|
| Source/APstack parameters |                       |  |                           | Notes |
| <input type="checkbox"/>  | Capillary temperature |  | 150 $\pm$ 25 $^{\circ}$ C |       |
| <input type="checkbox"/>  | Capillary voltage     |  | 48 $\pm$ 20 V             |       |
| <input type="checkbox"/>  | Tube Lens             |  | 100 $\pm$ 25 V            |       |
| <input type="checkbox"/>  | Source voltage        |  | 2.0 $\pm$ 0.5 kV          |       |

| Tune File Parameters |                          |                            |              | Notes |
|----------------------|--------------------------|----------------------------|--------------|-------|
|                      | <input type="checkbox"/> | Ion Trap Full Microscans   | 1            |       |
|                      | <input type="checkbox"/> | Ion Trap MSn Microscans    | 1            |       |
|                      | <input type="checkbox"/> | Ion Trap Full Max Ion Time | 100          |       |
|                      | <input type="checkbox"/> | Ion Trap MSn Max Ion Time  | 100          |       |
|                      | <input type="checkbox"/> | Ion Trap Full AGC Target   | 30,000       |       |
|                      | <input type="checkbox"/> | Ion Trap MSn AGC Target    | 10,000       |       |
| MS detector          |                          |                            |              | Notes |
|                      | <input type="checkbox"/> | Acquire time (min)         | 184          |       |
|                      | <input type="checkbox"/> | Start delay (min)          | 15           |       |
|                      | <input type="checkbox"/> | Segments                   | 1            |       |
|                      | <input type="checkbox"/> | Scan Events                | 9            |       |
|                      | <input type="checkbox"/> | Scan Range for Event 1     | m/z 300-2000 |       |
|                      | <input type="checkbox"/> | Mass range for all events  | Normal       |       |
|                      | <input type="checkbox"/> | Scan Rate for all events   | Normal       |       |
|                      | <input type="checkbox"/> | Polarity for all events    | Positive     |       |
|                      | <input type="checkbox"/> | Data type for MS scan      | Centroid     |       |
|                      | <input type="checkbox"/> | Data Type for MSn Scan     | Centroid     |       |
|                      | <input type="checkbox"/> | Additional microscans      | 0            |       |



| Dynamic Exclusion |                          |                                                     |         | Notes |
|-------------------|--------------------------|-----------------------------------------------------|---------|-------|
|                   | <input type="checkbox"/> | Repeat Count                                        | 1       |       |
|                   | <input type="checkbox"/> | Repeat duration (s)                                 | 0       |       |
|                   | <input type="checkbox"/> | Exclusion list size                                 | 150     |       |
|                   | <input type="checkbox"/> | Exclusion duration (s)                              | 60      |       |
|                   | <input type="checkbox"/> | Exclusion mass width                                | By mass |       |
|                   | <input type="checkbox"/> | Exclusion mass width (low)                          | 1.0     |       |
|                   | <input type="checkbox"/> | Exclusion mass width (high)                         | 3.5     |       |
|                   | <input type="checkbox"/> | Early expiration is NOT used                        |         |       |
| Scan Event        |                          |                                                     |         | Notes |
|                   | <input type="checkbox"/> | Charge state screening and Rejection is NOT enabled |         |       |
|                   | <input type="checkbox"/> | Minimum MS signal Threshold for MS2 trigger         | 500     |       |
|                   | <input type="checkbox"/> | Mass determined from scan event                     | 1       |       |
|                   | <input type="checkbox"/> | Activation type                                     | CID     |       |
|                   | <input type="checkbox"/> | Default charge state                                | 4       |       |
|                   | <input type="checkbox"/> | Isolation width (m/z)                               | 2.0     |       |
|                   | <input type="checkbox"/> | Normalized collision energy                         | 28      |       |
|                   | <input type="checkbox"/> | Activation Q                                        | 0.250   |       |

|                                           |                          |                                                                                                       |                                        |       |
|-------------------------------------------|--------------------------|-------------------------------------------------------------------------------------------------------|----------------------------------------|-------|
|                                           | <input type="checkbox"/> | Activation time (s)                                                                                   | 30.0                                   |       |
|                                           | <input type="checkbox"/> | Mass lists and global mass lists NOT used                                                             |                                        |       |
|                                           | <input type="checkbox"/> | For each Current Scan Event, the Nth most intense ion is set at 8-1 for scan events 2-9, respectively |                                        |       |
| <b>HPLC Parameters and chromatography</b> |                          |                                                                                                       |                                        | Notes |
|                                           | <input type="checkbox"/> | Autosampler temperature                                                                               | 10C                                    |       |
|                                           | <input type="checkbox"/> | Column dimensions                                                                                     | 11-13 cm x 100 $\mu$ m*                |       |
|                                           | <input type="checkbox"/> | Precolumn dimensions                                                                                  | 2-4 cm x 100 $\mu$ m**                 |       |
|                                           | <input type="checkbox"/> | Column packing material                                                                               | Jupiter C18                            |       |
|                                           | <input type="checkbox"/> | Column temperature                                                                                    | Room temperature                       |       |
|                                           | <input type="checkbox"/> | Mobile phase A                                                                                        | 0.1% (v/v) formic acid in water        |       |
|                                           | <input type="checkbox"/> | Mobile phase B                                                                                        | 0.1% (v/v) formic acid in acetonitrile |       |
|                                           | <input type="checkbox"/> | Injection volume                                                                                      | 2.0 $\mu$ L                            |       |
|                                           | <input type="checkbox"/> | Injection loop (or needle) volume                                                                     | 8.0 $\mu$ L***                         |       |
|                                           | <input type="checkbox"/> | Flow rate for gradient                                                                                | 600 +/- 200 nL/min at column tip       |       |
|                                           | <input type="checkbox"/> | Flow rate for loading phase                                                                           | As per individual lab protocol         |       |

|  |                          |                                                   |                       |  |
|--|--------------------------|---------------------------------------------------|-----------------------|--|
|  | <input type="checkbox"/> | 184 min HPLC gradient for yeast samples           | As per attached table |  |
|  | <input type="checkbox"/> | 95 min HPLC gradient for NCI20 and blanks samples | As per attached table |  |

\* Column length may vary depending upon the individual nanospray set up, but inner diameter should remain the same.

\*\* Precolumn is optional depending upon individual laboratory expertise, but should be used if at all possible. Column length may vary depending upon the individual nanospray set up, but inner diameter should remain the same.

\*\*\* If not possible to achieve, use same set up as dress rehearsal and make note of change.

| <b>HPLC Gradient with “vented” column</b> |     |    |                    |       |
|-------------------------------------------|-----|----|--------------------|-------|
| Time                                      | %A  | %B | Flow               | Notes |
| 0                                         | 100 | 0  | To Waste*          |       |
| 0.01                                      | 100 | 0  | To Waste           |       |
| 10                                        | 100 | 0  | To Waste           |       |
| 15                                        | 98  | 2  | To Waste           |       |
| 15.01                                     | 98  | 2  | To column (source) |       |
| 135                                       | 60  | 40 | To column (source) |       |
| 150                                       | 10  | 90 | To column (source) |       |
| 155                                       | 10  | 90 | To column (source) |       |
| 159                                       | 10  | 90 | To column (source) |       |
| 164                                       | 95  | 5  | To column (source) |       |
| 169                                       | 100 | 0  | To column (source) |       |
| 184                                       | 100 | 0  | To column (source) |       |

\* If using a precolumn, the flow should be directed to waste if possible.

| <b>95 min HPLC Gradient with “vented” column for blanks and NCI-20</b> |     |    |                    |       |
|------------------------------------------------------------------------|-----|----|--------------------|-------|
| Time                                                                   | %A  | %B | Flow               | Notes |
| 0                                                                      | 100 | 0  | To Waste*          |       |
| 0.01                                                                   | 100 | 0  | To Waste           |       |
| 10                                                                     | 100 | 0  | To Waste           |       |
| 15                                                                     | 98  | 2  | To Waste           |       |
| 15.01                                                                  | 98  | 2  | To column (source) |       |
| 50                                                                     | 75  | 25 | To column (source) |       |
| 65                                                                     | 10  | 90 | To column (source) |       |
| 70                                                                     | 10  | 90 | To column (source) |       |
| 74                                                                     | 10  | 90 | To column (source) |       |
| 75                                                                     | 95  | 5  | To column (source) |       |
| 80                                                                     | 100 | 0  | To column (source) |       |
| 95                                                                     | 100 | 0  | To column (source) |       |

\*If using a precolumn, the flow should be directed to waste.

Run order:

| Run number | Sample                  | Gradient         |
|------------|-------------------------|------------------|
| 1          | <b>Sample 1-B-NCI20</b> | 95 min gradient  |
| 2          | Wash*                   |                  |
| 3          | Blank                   | 95 min gradient  |
| 4          | <b>Sample 3-A-Yeast</b> | 184 min gradient |
| 5          | Wash*                   |                  |
| 6          | Blank                   | 95 min gradient  |
| 7          | <b>Sample 3-A-Yeast</b> | 184 min gradient |

|           |                                |                  |
|-----------|--------------------------------|------------------|
| 8         | Wash*                          |                  |
| 9         | Blank                          | 95 min gradient  |
| <b>10</b> | <b>Sample 3-A-Yeast</b>        | 184 min gradient |
| 11        | Wash*                          |                  |
| 12        | Blank                          | 95 min gradient  |
| <b>13</b> | <b>Sample 1-B-NCI20</b>        | 95 min gradient  |
| 14        | Wash*                          |                  |
| 15        | Blank                          | 95 min gradient  |
| <b>16</b> | <b>Sample 3-B-Spiked Yeast</b> | 184 min gradient |
| 17        | Wash*                          |                  |
| 18        | Blank                          | 95 min gradient  |
| <b>19</b> | <b>Sample 3-B-Spiked Yeast</b> | 184 min gradient |
| 20        | Wash*                          |                  |
| 21        | Blank                          | 95 min gradient  |
| <b>22</b> | <b>Sample 3-B-Spiked Yeast</b> | 184 min gradient |
| 23        | Wash*                          |                  |
| 24        | Blank                          | 95 min gradient  |
| <b>25</b> | <b>Sample 1-B-NCI20</b>        | 95 min gradient  |
| 26        | Wash*                          |                  |
| 27        | Blank                          | 95 min gradient  |
| <b>28</b> | <b>Sample 3-A-Yeast</b>        | 184 min gradient |
| 29        | Wash*                          |                  |
| 30        | Blank                          | 95 min gradient  |
| <b>31</b> | <b>Sample 3-A-Yeast</b>        | 184 min gradient |
| 32        | Wash*                          |                  |
| 33        | Blank                          | 95 min gradient  |
| <b>34</b> | <b>Sample 3-A-Yeast</b>        | 184 min gradient |

|           |                                |                  |
|-----------|--------------------------------|------------------|
| 35        | Wash*                          |                  |
| 36        | Blank                          | 95 min gradient  |
| <b>37</b> | <b>Sample 1-B-NCI20</b>        | 95 min gradient  |
| 38        | Wash*                          |                  |
| 39        | Blank                          | 95 min gradient  |
| <b>40</b> | <b>Sample 3-B-Spiked Yeast</b> | 184 min gradient |
| 41        | Wash*                          |                  |
| 42        | Blank                          | 95 min gradient  |
| <b>43</b> | <b>Sample 3-B-Spiked Yeast</b> | 184 min gradient |
| 44        | Wash*                          |                  |
| 45        | Blank                          | 95 min gradient  |
| <b>46</b> | <b>Sample 3-B-Spiked Yeast</b> | 184 min gradient |
| 47        | Wash*                          |                  |
| 48        | Blank                          | 95 min gradient  |
| <b>49</b> | <b>Sample 1-B-NCI20</b>        | 95 min gradient  |

\* As per individual laboratory protocol

| <b>Orbitrap SOP Checklist</b>    |                          |                       |              |
|----------------------------------|--------------------------|-----------------------|--------------|
| <b>Source/APstack parameters</b> |                          |                       | <b>Notes</b> |
|                                  | <input type="checkbox"/> | Capillary temperature | 150 ± 25°C   |
|                                  | <input type="checkbox"/> | Capillary voltage     | 48 ± 20 V    |
|                                  | <input type="checkbox"/> | Tube Lens             | 100 ± 25 V   |
|                                  | <input type="checkbox"/> | Source voltage        | 2.0 ± 0.5 kV |

| Tune File Parameters |                          |                           |              | Notes |
|----------------------|--------------------------|---------------------------|--------------|-------|
|                      | <input type="checkbox"/> | FTMS Full Microscans      | 1            |       |
|                      | <input type="checkbox"/> | Ion Trap MSn Microscans   | 1            |       |
|                      | <input type="checkbox"/> | FTMS Full Max Ion Time    | 1000         |       |
|                      | <input type="checkbox"/> | Ion Trap MSn Max Ion Time | 100          |       |
|                      | <input type="checkbox"/> | FTMS Full AGC Target      | 1,000,000    |       |
|                      | <input type="checkbox"/> | Ion Trap MSn AGC Target   | 10,000       |       |
| MS detector          |                          |                           |              | Notes |
|                      | <input type="checkbox"/> | Acquire time (min)        | 184          |       |
|                      | <input type="checkbox"/> | Start delay (min)         | 15           |       |
|                      | <input type="checkbox"/> | Segments                  | 1            |       |
|                      | <input type="checkbox"/> | Scan Events               | 9            |       |
|                      | <input type="checkbox"/> | Scan Range for Event 1    | m/z 300-2000 |       |
|                      | <input type="checkbox"/> | Mass range for all events | Normal       |       |
|                      | <input type="checkbox"/> | Scan Rate for all events  | Normal       |       |
|                      | <input type="checkbox"/> | Polarity for all events   | Positive     |       |
|                      | <input type="checkbox"/> | Data type for MS scan     | Profile      |       |
|                      | <input type="checkbox"/> | Data Type for MSn Scan    | Centroid     |       |
|                      | <input type="checkbox"/> | Additional microscans     | 0            |       |
|                      | <input type="checkbox"/> | Resolution of MS scan     | 60,000       |       |
|                      | <input type="checkbox"/> | Lock mass is NOT enabled  |              |       |

| <b>Dynamic Exclusion</b>              |                          |                                              |         | Notes |
|---------------------------------------|--------------------------|----------------------------------------------|---------|-------|
|                                       | <input type="checkbox"/> | Repeat Count                                 | 1       |       |
|                                       | <input type="checkbox"/> | Repeat duration (s)                          | 0       |       |
|                                       | <input type="checkbox"/> | Exclusion list size                          | 150     |       |
|                                       | <input type="checkbox"/> | Exclusion duration (s)                       | 60      |       |
|                                       | <input type="checkbox"/> | Exclusion mass width                         | By mass |       |
|                                       | <input type="checkbox"/> | Exclusion mass width (low)                   | 0.6     |       |
|                                       | <input type="checkbox"/> | Exclusion mass width (high)                  | 0.6     |       |
|                                       | <input type="checkbox"/> | Early expiration is NOT used                 |         |       |
| <b>Global Data-Dependent Settings</b> |                          |                                              |         | Notes |
|                                       | <input type="checkbox"/> | Charge state screening enabled               |         |       |
|                                       | <input type="checkbox"/> | Monoisotopic precursor selection enabled     |         |       |
|                                       | <input type="checkbox"/> | Non-peptide monoisotopic recognition enabled |         |       |
|                                       | <input type="checkbox"/> | Charge state +1 rejected                     |         |       |
|                                       | <input type="checkbox"/> | Unassigned charge state rejected             |         |       |
| <b>Scan Event</b>                     |                          |                                              |         | Notes |
|                                       | <input type="checkbox"/> | Minimum MS signal Threshold for MS2 trigger  | 500     |       |
|                                       | <input type="checkbox"/> | Mass determined from scan event              | 1       |       |
|                                       | <input type="checkbox"/> | Activation type                              | CID     |       |
|                                       | <input type="checkbox"/> | Default charge state                         | 4       |       |
|                                       | <input type="checkbox"/> | Isolation width (m/z)                        | 2.0     |       |



|                                           |                          |                                                                                                       |                                        |       |
|-------------------------------------------|--------------------------|-------------------------------------------------------------------------------------------------------|----------------------------------------|-------|
|                                           | <input type="checkbox"/> | Normalized collision energy                                                                           | 28                                     |       |
|                                           | <input type="checkbox"/> | Activation Q                                                                                          | 0.250                                  |       |
|                                           | <input type="checkbox"/> | Activation time (s)                                                                                   | 30.0                                   |       |
|                                           | <input type="checkbox"/> | Mass lists and global mass lists NOT used                                                             |                                        |       |
|                                           | <input type="checkbox"/> | For each Current Scan Event, the Nth most intense ion is set at 8-1 for scan events 2-9, respectively |                                        |       |
| <b>HPLC Parameters and chromatography</b> |                          |                                                                                                       |                                        | Notes |
|                                           | <input type="checkbox"/> | Autosampler temperature                                                                               | 10C                                    |       |
|                                           | <input type="checkbox"/> | Column dimensions                                                                                     | 11-13 cm x 100 $\mu$ m*                |       |
|                                           | <input type="checkbox"/> | Precolumn dimensions                                                                                  | 2-4 cm x 100 $\mu$ m**                 |       |
|                                           | <input type="checkbox"/> | Column packing material                                                                               | Jupiter C18                            |       |
|                                           | <input type="checkbox"/> | Column temperature                                                                                    | Room temperature                       |       |
|                                           | <input type="checkbox"/> | Mobile phase A                                                                                        | 0.1% (v/v) formic acid in water        |       |
|                                           | <input type="checkbox"/> | Mobile phase B                                                                                        | 0.1% (v/v) formic acid in acetonitrile |       |
|                                           | <input type="checkbox"/> | Injection volume                                                                                      | 2.0 $\mu$ L                            |       |
|                                           | <input type="checkbox"/> | Injection loop (or needle) volume                                                                     | 8.0 $\mu$ L***                         |       |
|                                           | <input type="checkbox"/> | Flow rate for gradient                                                                                | 600 +/- 200 nL/min at column tip       |       |
|                                           | <input type="checkbox"/> | Flow rate for loading phase                                                                           | As per individual lab protocol         |       |
|                                           | <input type="checkbox"/> | 184 min HPLC gradient for yeast samples                                                               | As per attached table                  |       |
|                                           | <input type="checkbox"/> | 95 min HPLC gradient for NCI20 and blanks samples                                                     | As per attached table                  |       |

\* Column length may vary depending upon the individual nanospray set up, but inner diameter should remain the same.

\*\* Precolumn is optional depending upon individual laboratory expertise, but should be used if at all possible. Column length may vary depending upon the individual nanospray set up, but inner diameter should remain the same.

\*\*\* If not possible, use same set up as dress rehearsal and make note of change.

| <b>184 min HPLC Gradient with “vented” column for yeast samples</b> |     |    |                    |       |
|---------------------------------------------------------------------|-----|----|--------------------|-------|
| Time                                                                | %A  | %B | Flow               | Notes |
| 0                                                                   | 100 | 0  | To Waste*          |       |
| 0.01                                                                | 100 | 0  | To Waste           |       |
| 10                                                                  | 100 | 0  | To Waste           |       |
| 15                                                                  | 98  | 2  | To Waste           |       |
| 15.01                                                               | 98  | 2  | To column (source) |       |
| 135                                                                 | 60  | 40 | To column (source) |       |
| 150                                                                 | 10  | 90 | To column (source) |       |
| 155                                                                 | 10  | 90 | To column (source) |       |
| 159                                                                 | 10  | 90 | To column (source) |       |
| 164                                                                 | 95  | 5  | To column (source) |       |
| 169                                                                 | 100 | 0  | To column (source) |       |
| 184                                                                 | 100 | 0  | To column (source) |       |

\*If using a precolumn, the flow should be directed to waste.

**95 min HPLC Gradient with “vented” column for blanks and NCI-20**

| Time  | %A  | %B | Flow               | Notes |
|-------|-----|----|--------------------|-------|
| 0     | 100 | 0  | To Waste*          |       |
| 0.01  | 100 | 0  | To Waste           |       |
| 10    | 100 | 0  | To Waste           |       |
| 15    | 98  | 2  | To Waste           |       |
| 15.01 | 98  | 2  | To column (source) |       |
| 50    | 75  | 25 | To column (source) |       |
| 65    | 10  | 90 | To column (source) |       |
| 70    | 10  | 90 | To column (source) |       |
| 74    | 10  | 90 | To column (source) |       |
| 75    | 95  | 5  | To column (source) |       |
| 80    | 100 | 0  | To column (source) |       |
| 95    | 100 | 0  | To column (source) |       |

\*If using a precolumn, the flow should be directed to waste.

Run order:

| <b>Run Number</b> | <b>Sample</b>                  | <b>Gradient</b>  |
|-------------------|--------------------------------|------------------|
| 1                 | <b>Sample 1-B-NCI20</b>        | 95 min gradient  |
| 2                 | Wash*                          |                  |
| 3                 | Blank                          | 95 min gradient  |
| 4                 | <b>Sample 3-A-Yeast</b>        | 184 min gradient |
| 5                 | Wash*                          |                  |
| 6                 | Blank                          | 95 min gradient  |
| 7                 | <b>Sample 3-A-Yeast</b>        | 184 min gradient |
| 8                 | Wash*                          |                  |
| 9                 | Blank                          | 95 min gradient  |
| 10                | <b>Sample 3-A-Yeast</b>        | 184 min gradient |
| 11                | Wash*                          |                  |
| 12                | Blank                          | 95 min gradient  |
| 13                | <b>Sample 1-B-NCI20</b>        | 95 min gradient  |
| 14                | Wash*                          |                  |
| 15                | Blank                          | 95 min gradient  |
| 16                | <b>Sample 3-B-Spiked Yeast</b> | 184 min gradient |
| 17                | Wash*                          |                  |
| 18                | Blank                          | 95 min gradient  |
| 19                | <b>Sample 3-B-Spiked Yeast</b> | 184 min gradient |
| 20                | Wash*                          |                  |
| 21                | Blank                          | 95 min gradient  |
| 22                | <b>Sample 3-B-Spiked Yeast</b> | 184 min gradient |
| 23                | Wash*                          |                  |

|           |                                |                  |
|-----------|--------------------------------|------------------|
| 24        | Blank                          | 95 min gradient  |
| <b>25</b> | <b>Sample 1-B-NCI20</b>        | 95 min gradient  |
| 26        | Wash*                          |                  |
| 27        | Blank                          | 95 min gradient  |
| <b>28</b> | <b>Sample 3-A-Yeast</b>        | 184 min gradient |
| 29        | Wash*                          |                  |
| 30        | Blank                          | 95 min gradient  |
| <b>31</b> | <b>Sample 3-A-Yeast</b>        | 184 min gradient |
| 32        | Wash*                          |                  |
| 33        | Blank                          | 95 min gradient  |
| <b>34</b> | <b>Sample 3-A-Yeast</b>        | 184 min gradient |
| 35        | Wash*                          |                  |
| 36        | Blank                          | 95 min gradient  |
| <b>37</b> | <b>Sample 1-B-NCI20</b>        | 95 min gradient  |
| 38        | Wash*                          |                  |
| 39        | Blank                          | 95 min gradient  |
| <b>40</b> | <b>Sample 3-B-Spiked Yeast</b> | 184 min gradient |
| 41        | Wash*                          |                  |
| 42        | Blank                          | 95 min gradient  |
| <b>43</b> | <b>Sample 3-B-Spiked Yeast</b> | 184 min gradient |
| 44        | Wash*                          |                  |
| 45        | Blank                          | 95 min gradient  |
| <b>46</b> | <b>Sample 3-B-Spiked Yeast</b> | 184 min gradient |
| 47        | Wash*                          |                  |
| 48        | Blank                          | 95 min gradient  |
| <b>49</b> | <b>Sample 1-B-NCI20</b>        | 95 min gradient  |

\* As per individual laboratory protocol

## Upload Instructions for Study5: Unbiased Discovery, Yeast + BSA Experiment

- 1.) Browse to <https://chemdata.nist.gov/cptac/> (ignore the security warning and click OK. A signed third party certificate is in the process of being purchased to prevent these warnings in the future).
- 2.) Enter your 'log-in' name and password. (Sent to each contact in a separate e-mail.)
- 3.) Select '**Study5**' from the selector at the top of the navigation bar. (Do not use the Study3 section for these data files).
- 4.) Find your site and the instrument for which you are uploading data on the navigation bar. Click on 'Yeast + BSA Experiment' under that instrument.
- 5.) Follow the instructions in the box for Step 3. All data files and any annotation forms should be first copied to a **single directory** for upload. Please include the completed SOP checklist (above) in that directory. Uploading multiple directories or replicate experiments is allowed.
- 6.) Enter the name of your SOP contact in the box at Step 4. Click 'Sign.' The 'Upload' hyperlink at Step 5 is now active.
- 7.) Click on 'Upload' to launch Tranche. This requires Java JRE to be installed. Browse to the directory you wish to upload to begin the data transfer.
- 8.) Once you see a box displaying "*Upload Complete. Please check NIST website*" your upload has completed. You do not have to leave you web browser open for the upload to continue. You can view all uploads by clicking 'Download Data' from the navigation bar.

### Timeline for Study 5

| Task                                  | Duration | Start Date | End Date   |
|---------------------------------------|----------|------------|------------|
| NIST sends out samples for full study | 2 days   | 10/4/2007  | 10/5/2007  |
| Labs perform full study               | 14 days  | 10/8/2007  | 10/24/2007 |
| Labs upload data to Tranche           | 1 day    | 10/25/2007 | 10/25/2007 |
| Yeast data is analyzed                | 30 days  | 10/29/2007 | 12/7/2007  |
| Interim results reported to PCC       | 1 day    | 10/23/2007 | 10/23/2007 |
| Yeast results reported to PCC         | 1 day    | 12/18/2007 | 12/18/2007 |

## Study 6 Experimental Plan: SOP v2.2

### CPTAC Unbiased Discovery Working Group Study 6 SOP

The CPTAC Unbiased Discovery Working Group was tasked to design a renewable, standardized set of reference samples for benchmarking LC-MS/MS platforms with respect to performance characteristics relevant to shotgun proteomics-based biomarker discovery. The first CPTAC-wide experiment of this working group was to test a yeast lysate spiked with a human protein mix. Due to complications with the human protein mix that we were to use, we have performed a preliminary experiment to include only a single protein, bovine serum albumin (BSA). This initial spiked sample provided a means for comparing performance of LC/MS/MS platforms amongst the CPTAC participants and helped to further refine this SOP. As we have since sorted out issues with the digestion of Sigma's Universal Protein Standard (Sigma48), we are moving forward with our goal to assess the limits of detection for biomarker discovery in our model standard yeast. In addition, we are developing a performance standard that will provide a means for comparing performance of LC/MS/MS platforms i) as a quality control over time, ii) after the addition of new technologies to evaluate their effectiveness compared to historic data, or iii) between laboratories to inform optimization and troubleshooting.

The experiment has been designed to meet two primary goals. First, the study will provide an assessment of run-to-run and lab-to-lab variability for a complex mixture of proteins. Also, the study will provide a measure of the sensitivity of a mass-spec platform in a yeast lysate. This will be achieved by calculating the power required to detect a difference for the overall sensitivity of the platform for a given protein abundance.

This proposed standard operating procedure (SOP) was developed after initial testing of several yeast lysate and Sigma48 samples at Vanderbilt University. After an initial Study 3 and Study 5 results, the SOP was re-evaluated and refined to achieve better compliance as well as standardize new parameters that may have led to variance in the initial studies.

#### **Study Samples:**

The yeast lysate was digested using RapiGest as denaturant and iodoacetamide as alkylating reagent at NIST. The Sigma48 sample was digested at Vanderbilt using a protocol involving TFE solubilization and also using iodoacetamide as the alkylating reagent. The digested Sigma48 was spiked in at 5 different concentrations from 20 fmol/uL to 0.25 fmol/uL. The yeast digest alone, the Sigma48 digest alone and the NCI 20 will all be used as QC standards for these experiments. Given the limited quantity of Sigma48, these will be sent in **25uL aliquots**, so plan experiments carefully.

Table 1 contains descriptive and concentration information on the study samples:

**Table 3** NCI CPTAC Study 5 samples

| Sample       | Description                                   | [Total Yeast Protein] | [Sigma48]    |
|--------------|-----------------------------------------------|-----------------------|--------------|
| Sample 6-QC1 | Sigma48                                       | 0                     | 20 fmol/uL   |
| Sample 6-QC2 | unspiked digested yeast                       | 60 ng/ $\mu$ L        | 0            |
| Sample 1-B   | digested NCI-20 protein mix                   |                       |              |
| Sample 6A    | 0.25 fmol/uL Sigma48 spiked into yeast digest | 60 ng/uL              | 0.25 fmol/uL |
| Sample 6B    | 0.74 fmol/uL Sigma48 spiked into yeast digest | 60 ng/uL              | 0.74 fmol/uL |
| Sample 6C    | 2.2 fmol/uL Sigma48 spiked into yeast digest  | 60 ng/uL              | 2.2 fmol/uL  |
| Sample 6D    | 6.7 fmol/uL Sigma48 spiked into yeast digest  | 60 ng/uL              | 6.7 fmol/uL  |
| Sample 6E    | 20 fmol/uL Sigma48 spiked into yeast digest   | 60 ng/uL              | 20 fmol/uL   |

For Study 6, 1 vial of digested Sigma48 (Sample 6-QC1), 1 vial of digested, unspiked yeast (Sample 6-QC2), 1 vial of digested NCI 20 protein mix (Sample 1B) and 5 vials with varying concentrations of digested Sigma48 spiked into digested yeast (Samples 6A-6E) will be sent to each laboratory. Prior to analysis, **Sample 1B should be diluted 150-fold with 0.1% formic acid in water**. All other samples do not need be diluted.

Below are checklists that outline the HPLC and mass spectrometry parameters of this SOP for both a Thermo LTQ and Thermo Orbitrap. The run order for the samples follow the checklists. Participants will adhere as closely to these guidelines as possible with the understanding that not all labs are able to utilize a precolumn and, depending upon their nanospray set up, these chromatographic dimensions (length only) may change somewhat. This updated SOP has been changed slightly and these changes are **highlighted** in the respective SOP's. **The flow rate for these experiments has now been standardized too 600 nL/min and should not be deviated from. In addition, it has been specified that wideband activation is NOT to be used.** Any derivations from the protocol must be recorded. All participants should use the Jupiter C18 resin sent to their respective labs.

If possible, participants should pack their columns at 1000 PSI in methanol and then finish packing with the HPLC at 50:50 0.1% formic:acetonitrile on the HPLC for 30 min prior to cutting back the columns to their final dimensions. Please note any discrepancies from this procedure. The column should also be conditioned prior to use with an injection of a concentrated protein digest (such as a BSA digest)



followed by several injections of a less concentrated digest. Several blank runs should be performed after conditioning to eliminate carryover of the conditioning digest into the first blank of the study.

It is recommended that each lab run a preliminary test run with the SOP methods and check the parameters recorded in the data file against the check lists provided. This will help to find errors in tune file parameters that can sometimes be tricky to spot.

| <b>LTD SOP Checklist</b>         |                          |                            |              |       |
|----------------------------------|--------------------------|----------------------------|--------------|-------|
| <b>Source/APstack parameters</b> |                          |                            |              | Notes |
|                                  | <input type="checkbox"/> | Capillary temperature      | 150 ± 25°C   |       |
|                                  | <input type="checkbox"/> | Capillary voltage          | 48 ± 20 V    |       |
|                                  | <input type="checkbox"/> | Tube Lens                  | 100 ± 25 V   |       |
|                                  | <input type="checkbox"/> | Source voltage             | 2.0 ± 0.5 kV |       |
| <b>Tune File Parameters</b>      |                          |                            |              | Notes |
|                                  | <input type="checkbox"/> | Ion Trap Full Microscans   | 1            |       |
|                                  | <input type="checkbox"/> | Ion Trap MSn Microscans    | 1            |       |
|                                  | <input type="checkbox"/> | Ion Trap Full Max Ion Time | 100          |       |
|                                  | <input type="checkbox"/> | Ion Trap MSn Max Ion Time  | 100          |       |
|                                  | <input type="checkbox"/> | Ion Trap Full AGC Target   | 30,000       |       |
|                                  | <input type="checkbox"/> | Ion Trap MSn AGC Target    | 10,000       |       |
| <b>MS detector</b>               |                          |                            |              | Notes |
|                                  | <input type="checkbox"/> | Acquire time (min)         | 184          |       |
|                                  | <input type="checkbox"/> | Start delay (min)          | 15           |       |

|                          |                          |                                                     |              |       |
|--------------------------|--------------------------|-----------------------------------------------------|--------------|-------|
|                          | <input type="checkbox"/> | Segments                                            | 1            |       |
|                          | <input type="checkbox"/> | Scan Events                                         | 9            |       |
|                          | <input type="checkbox"/> | Scan Range for Event 1                              | m/z 300-2000 |       |
|                          | <input type="checkbox"/> | Mass range for all events                           | Normal       |       |
|                          | <input type="checkbox"/> | Scan Rate for all events                            | Normal       |       |
|                          | <input type="checkbox"/> | Polarity for all events                             | Positive     |       |
|                          | <input type="checkbox"/> | Data type for MS scan                               | Centroid     |       |
|                          | <input type="checkbox"/> | Data Type for MSn Scan                              | Centroid     |       |
|                          | <input type="checkbox"/> | Additional microscans                               | 0            |       |
| <b>Dynamic Exclusion</b> |                          |                                                     |              | Notes |
|                          |                          |                                                     |              |       |
|                          | <input type="checkbox"/> | Repeat Count                                        | 1            |       |
|                          | <input type="checkbox"/> | Repeat duration (s)                                 | 0            |       |
|                          | <input type="checkbox"/> | Exclusion list size                                 | 150          |       |
|                          | <input type="checkbox"/> | Exclusion duration (s)                              | 60           |       |
|                          | <input type="checkbox"/> | Exclusion mass width                                | By mass      |       |
|                          | <input type="checkbox"/> | Exclusion mass width (low)                          | 1.0          |       |
|                          | <input type="checkbox"/> | Exclusion mass width (high)                         | 3.5          |       |
|                          | <input type="checkbox"/> | Early expiration is NOT used                        |              |       |
| <b>Scan Event</b>        |                          |                                                     |              | Notes |
|                          |                          |                                                     |              |       |
|                          | <input type="checkbox"/> | Charge state screening and Rejection is NOT enabled |              |       |

|                                           |                          |                                                                                                       |                   |       |
|-------------------------------------------|--------------------------|-------------------------------------------------------------------------------------------------------|-------------------|-------|
|                                           | <input type="checkbox"/> | Minimum MS signal Threshold for MS2 trigger                                                           | 500               |       |
|                                           | <input type="checkbox"/> | Mass determined from scan event                                                                       | 1                 |       |
|                                           | <input type="checkbox"/> | Activation type                                                                                       | CID               |       |
|                                           | <input type="checkbox"/> | Default charge state                                                                                  | 4                 |       |
|                                           | <input type="checkbox"/> | Isolation width (m/z)                                                                                 | 2.0               |       |
|                                           | <input type="checkbox"/> | Normalized collision energy                                                                           | 28                |       |
|                                           | <input type="checkbox"/> | Activation Q                                                                                          | 0.250             |       |
|                                           | <input type="checkbox"/> | Activation time (s)                                                                                   | 30.0              |       |
|                                           | <input type="checkbox"/> | Mass lists and global mass lists NOT used                                                             |                   |       |
|                                           | <input type="checkbox"/> | Wideband Activation NOT used                                                                          |                   |       |
|                                           | <input type="checkbox"/> | For each Current Scan Event, the Nth most intense ion is set at 8-1 for scan events 2-9, respectively |                   |       |
| <b>HPLC Parameters and chromatography</b> |                          |                                                                                                       |                   | Notes |
|                                           | <input type="checkbox"/> | Autosampler temperature                                                                               | 10C               |       |
|                                           | <input type="checkbox"/> | Column dimensions                                                                                     | 11-13 cm x 100µm* |       |
|                                           | <input type="checkbox"/> | Precolumn dimensions                                                                                  | 2-4 cm x 100 µm** |       |
|                                           | <input type="checkbox"/> | Column packing material                                                                               | Jupiter C18       |       |

|                          |                                                   |                                        |  |
|--------------------------|---------------------------------------------------|----------------------------------------|--|
| <input type="checkbox"/> | Column temperature                                | Room temperature                       |  |
| <input type="checkbox"/> | Mobile phase A                                    | 0.1% (v/v) formic acid in water        |  |
| <input type="checkbox"/> | Mobile phase B                                    | 0.1% (v/v) formic acid in acetonitrile |  |
| <input type="checkbox"/> | Injection volume                                  | 2.0 $\mu$ L                            |  |
| <input type="checkbox"/> | Injection loop (or needle) volume                 | 8.0 $\mu$ L***                         |  |
| <input type="checkbox"/> | Flow rate for gradient                            | 600 nL/min at column tip               |  |
| <input type="checkbox"/> | Flow rate for loading phase                       | As per individual lab protocol         |  |
| <input type="checkbox"/> | 184 min HPLC gradient for yeast samples           | As per attached table                  |  |
| <input type="checkbox"/> | 95 min HPLC gradient for NCI20 and blanks samples | As per attached table                  |  |

\* Column length may vary depending upon the individual nanospray set up, but inner diameter should remain the same.

\*\* Precolumn is optional depending upon individual laboratory expertise, but should be used if at all possible. Column length may vary depending upon the individual nanospray set up, but inner diameter should remain the same.

\*\*\* If not possible to achieve, use same set up as dress rehearsal and make note of change.

| <b>HPLC Gradient with “vented” column</b> |     |    |           |       |
|-------------------------------------------|-----|----|-----------|-------|
| Time                                      | %A  | %B | Flow      | Notes |
| 0                                         | 100 | 0  | To Waste* |       |
| 0.01                                      | 100 | 0  | To Waste  |       |
| 10                                        | 100 | 0  | To Waste  |       |
| 15                                        | 98  | 2  | To Waste  |       |

|       |     |    |                    |  |
|-------|-----|----|--------------------|--|
| 15.01 | 98  | 2  | To column (source) |  |
| 135   | 60  | 40 | To column (source) |  |
| 150   | 10  | 90 | To column (source) |  |
| 155   | 10  | 90 | To column (source) |  |
| 159   | 10  | 90 | To column (source) |  |
| 164   | 95  | 5  | To column (source) |  |
| 169   | 100 | 0  | To column (source) |  |
| 184   | 100 | 0  | To column (source) |  |

\* If using a precolumn, the flow should be directed to waste if possible.

| <b>95 min HPLC Gradient with “vented” column for blanks and NCI-20</b> |     |    |                    |       |
|------------------------------------------------------------------------|-----|----|--------------------|-------|
| Time                                                                   | %A  | %B | Flow               | Notes |
| 0                                                                      | 100 | 0  | To Waste*          |       |
| 0.01                                                                   | 100 | 0  | To Waste           |       |
| 10                                                                     | 100 | 0  | To Waste           |       |
| 15                                                                     | 98  | 2  | To Waste           |       |
| 15.01                                                                  | 98  | 2  | To column (source) |       |
| 50                                                                     | 75  | 25 | To column (source) |       |
| 65                                                                     | 10  | 90 | To column (source) |       |
| 70                                                                     | 10  | 90 | To column (source) |       |
| 74                                                                     | 10  | 90 | To column (source) |       |
| 75                                                                     | 95  | 5  | To column (source) |       |
| 80                                                                     | 100 | 0  | To column (source) |       |
| 95                                                                     | 100 | 0  | To column (source) |       |

\*If using a precolumn, the flow should be directed to waste.

## Run order:

This series of samples is to be run in **triplicate**. You may run the triplicate runs back-to-back or as three separate replicates with other samples or maintenance in between. If the series is run back-to-back, there is no need to run the Sample 1B (NCI20) two times in a row.

| Run number | Sample                                                    | Gradient         |
|------------|-----------------------------------------------------------|------------------|
| 1          | <b>Sample 1-B-NCI20</b>                                   | 95 min gradient  |
| 2          | Wash*                                                     |                  |
| 3          | Blank                                                     | 95 min gradient  |
| 4          | <b>Sample QC-2 –Yeast only</b>                            | 184 min gradient |
| 5          | Wash*                                                     |                  |
| 6          | Blank                                                     | 95 min gradient  |
| 7          | <b>Sample 6A - 0.25 fmol/uL<br/>Sigma 48 spiked yeast</b> | 184 min gradient |
| 8          | Wash*                                                     |                  |
| 9          | Blank                                                     | 95 min gradient  |
| 10         | <b>Sample 6B - 0.74 fmol/uL<br/>Sigma 48 spiked yeast</b> | 184 min gradient |
| 11         | Wash*                                                     |                  |
| 12         | Blank                                                     | 95 min gradient  |
| 13         | <b>Sample 6C - 2.2 fmol/uL<br/>Sigma 48 spiked yeast</b>  | 184 min gradient |
| 14         | Wash*                                                     |                  |
| 15         | Blank                                                     | 95 min gradient  |
| 16         | <b>Sample 6D - 6.7 fmol/uL<br/>Sigma 48 spiked yeast</b>  | 184 min gradient |
| 17         | Wash*                                                     |                  |
| 18         | Blank                                                     | 95 min gradient  |
| 19         | <b>Sample 6E - 20 fmol/uL</b>                             | 184 min gradient |

|           |                                    |                  |
|-----------|------------------------------------|------------------|
|           | <b>Sigma 48 spiked yeast</b>       |                  |
| 20        | Wash*                              |                  |
| 21        | Blank                              | 95 min gradient  |
| <b>22</b> | <b>Sample QC-1 - Sigma 48 only</b> | 184 min gradient |
| 23        | Wash*                              |                  |
| 24        | Blank                              | 95 min gradient  |
| <b>25</b> | <b>Sample 1-B-NCI20</b>            | 95 min gradient  |

\* As per individual laboratory protocol

| <b>Orbitrap SOP Checklist</b>    |                           |  |              |       |
|----------------------------------|---------------------------|--|--------------|-------|
| <b>Source/APstack parameters</b> |                           |  |              | Notes |
| <input type="checkbox"/>         | Capillary temperature     |  | 150 ± 25°C   |       |
| <input type="checkbox"/>         | Capillary voltage         |  | 48 ± 20 V    |       |
| <input type="checkbox"/>         | Tube Lens                 |  | 100 ± 25 V   |       |
| <input type="checkbox"/>         | Source voltage            |  | 2.0 ± 0.5 kV |       |
| <b>Tune File Parameters</b>      |                           |  |              | Notes |
| <input type="checkbox"/>         | FTMS Full Microscans      |  | 1            |       |
| <input type="checkbox"/>         | Ion Trap MSn Microscans   |  | 1            |       |
| <input type="checkbox"/>         | FTMS Full Max Ion Time    |  | 1000         |       |
| <input type="checkbox"/>         | Ion Trap MSn Max Ion Time |  | 100          |       |
| <input type="checkbox"/>         | FTMS Full AGC Target      |  | 1,000,000    |       |
| <input type="checkbox"/>         | Ion Trap MSn AGC Target   |  | 10,000       |       |
| <b>MS detector</b>               |                           |  |              | Notes |
|                                  |                           |  |              |       |

|                                       |                          |                              |              |       |
|---------------------------------------|--------------------------|------------------------------|--------------|-------|
|                                       | <input type="checkbox"/> | Acquire time (min)           | 184          |       |
|                                       | <input type="checkbox"/> | Start delay (min)            | 15           |       |
|                                       | <input type="checkbox"/> | Segments                     | 1            |       |
|                                       | <input type="checkbox"/> | Scan Events                  | 9            |       |
|                                       | <input type="checkbox"/> | Scan Range for Event 1       | m/z 300-2000 |       |
|                                       | <input type="checkbox"/> | Mass range for all events    | Normal       |       |
|                                       | <input type="checkbox"/> | Scan Rate for all events     | Normal       |       |
|                                       | <input type="checkbox"/> | Polarity for all events      | Positive     |       |
|                                       | <input type="checkbox"/> | Data type for MS scan        | Profile      |       |
|                                       | <input type="checkbox"/> | Data Type for MSn Scan       | Centroid     |       |
|                                       | <input type="checkbox"/> | Additional microscans        | 0            |       |
|                                       | <input type="checkbox"/> | Resolution of MS scan        | 60,000       |       |
|                                       | <input type="checkbox"/> | Lock mass is NOT enabled     |              |       |
| <b>Dynamic Exclusion</b>              |                          |                              |              | Notes |
|                                       |                          |                              |              |       |
|                                       | <input type="checkbox"/> | Repeat Count                 | 1            |       |
|                                       | <input type="checkbox"/> | Repeat duration (s)          | 0            |       |
|                                       | <input type="checkbox"/> | Exclusion list size          | 150          |       |
|                                       | <input type="checkbox"/> | Exclusion duration (s)       | 60           |       |
|                                       | <input type="checkbox"/> | Exclusion mass width         | By mass      |       |
|                                       | <input type="checkbox"/> | Exclusion mass width (low)   | 0.6          |       |
|                                       | <input type="checkbox"/> | Exclusion mass width (high)  | 0.6          |       |
|                                       | <input type="checkbox"/> | Early expiration is NOT used |              |       |
| <b>Global Data-Dependent Settings</b> |                          |                              |              | Notes |



|                                           |                          |                                                                                                       |       |       |
|-------------------------------------------|--------------------------|-------------------------------------------------------------------------------------------------------|-------|-------|
|                                           | <input type="checkbox"/> | Charge state screening enabled                                                                        |       |       |
|                                           | <input type="checkbox"/> | Monoisotopic precursor selection enabled                                                              |       |       |
|                                           | <input type="checkbox"/> | Non-peptide monoisotopic recognition enabled                                                          |       |       |
|                                           | <input type="checkbox"/> | Charge state +1 rejected                                                                              |       |       |
|                                           | <input type="checkbox"/> | Unassigned charge state rejected                                                                      |       |       |
| <b>Scan Event</b>                         |                          |                                                                                                       |       | Notes |
|                                           | <input type="checkbox"/> | Minimum MS signal Threshold for MS2 trigger                                                           | 500   |       |
|                                           | <input type="checkbox"/> | Mass determined from scan event                                                                       | 1     |       |
|                                           | <input type="checkbox"/> | Activation type                                                                                       | CID   |       |
|                                           | <input type="checkbox"/> | Default charge state                                                                                  | 4     |       |
|                                           | <input type="checkbox"/> | Isolation width (m/z)                                                                                 | 2.0   |       |
|                                           | <input type="checkbox"/> | Normalized collision energy                                                                           | 28    |       |
|                                           | <input type="checkbox"/> | Activation Q                                                                                          | 0.250 |       |
|                                           | <input type="checkbox"/> | Activation time (s)                                                                                   | 30.0  |       |
|                                           | <input type="checkbox"/> | Mass lists and global mass lists NOT used                                                             |       |       |
|                                           | <input type="checkbox"/> | <b>Wideband Activation NOT used</b>                                                                   |       |       |
|                                           | <input type="checkbox"/> | For each Current Scan Event, the Nth most intense ion is set at 8-1 for scan events 2-9, respectively |       |       |
| <b>HPLC Parameters and chromatography</b> |                          |                                                                                                       |       | Notes |
|                                           |                          |                                                                                                       |       |       |

|                          |                                                   |                                        |  |
|--------------------------|---------------------------------------------------|----------------------------------------|--|
| <input type="checkbox"/> | Autosampler temperature                           | 10C                                    |  |
| <input type="checkbox"/> | Column dimensions                                 | 11-13 cm x 100 $\mu$ m*                |  |
| <input type="checkbox"/> | Precolumn dimensions                              | 2-4 cm x 100 $\mu$ m**                 |  |
| <input type="checkbox"/> | Column packing material                           | Jupiter C18                            |  |
| <input type="checkbox"/> | Column temperature                                | Room temperature                       |  |
| <input type="checkbox"/> | Mobile phase A                                    | 0.1% (v/v) formic acid in water        |  |
| <input type="checkbox"/> | Mobile phase B                                    | 0.1% (v/v) formic acid in acetonitrile |  |
| <input type="checkbox"/> | Injection volume                                  | 2.0 $\mu$ L                            |  |
| <input type="checkbox"/> | Injection loop (or needle) volume                 | 8.0 $\mu$ L***                         |  |
| <input type="checkbox"/> | Flow rate for gradient                            | 600 nL/min at column tip               |  |
| <input type="checkbox"/> | Flow rate for loading phase                       | As per individual lab protocol         |  |
| <input type="checkbox"/> | 184 min HPLC gradient for yeast samples           | As per attached table                  |  |
| <input type="checkbox"/> | 95 min HPLC gradient for NCI20 and blanks samples | As per attached table                  |  |

\* Column length may vary depending upon the individual nanospray set up, but inner diameter should remain the same.

\*\* Precolumn is optional depending upon individual laboratory expertise, but should be used if at all possible. Column length may vary depending upon the individual nanospray set up, but inner diameter should remain the same.

\*\*\* If not possible, use same set up as dress rehearsal and make note of change.

| <b>184 min HPLC Gradient with “vented” column for yeast samples</b> |     |    |                    |       |
|---------------------------------------------------------------------|-----|----|--------------------|-------|
| Time                                                                | %A  | %B | Flow               | Notes |
| 0                                                                   | 100 | 0  | To Waste*          |       |
| 0.01                                                                | 100 | 0  | To Waste           |       |
| 10                                                                  | 100 | 0  | To Waste           |       |
| 15                                                                  | 98  | 2  | To Waste           |       |
| 15.01                                                               | 98  | 2  | To column (source) |       |
| 135                                                                 | 60  | 40 | To column (source) |       |
| 150                                                                 | 10  | 90 | To column (source) |       |
| 155                                                                 | 10  | 90 | To column (source) |       |
| 159                                                                 | 10  | 90 | To column (source) |       |
| 164                                                                 | 95  | 5  | To column (source) |       |
| 169                                                                 | 100 | 0  | To column (source) |       |
| 184                                                                 | 100 | 0  | To column (source) |       |

\*If using a precolumn, the flow should be directed to waste.

| <b>95 min HPLC Gradient with “vented” column for blanks and NCI-20</b> |     |    |                    |       |
|------------------------------------------------------------------------|-----|----|--------------------|-------|
| Time                                                                   | %A  | %B | Flow               | Notes |
| 0                                                                      | 100 | 0  | To Waste*          |       |
| 0.01                                                                   | 100 | 0  | To Waste           |       |
| 10                                                                     | 100 | 0  | To Waste           |       |
| 15                                                                     | 98  | 2  | To Waste           |       |
| 15.01                                                                  | 98  | 2  | To column (source) |       |
| 50                                                                     | 75  | 25 | To column (source) |       |

|    |     |    |                    |  |
|----|-----|----|--------------------|--|
| 65 | 10  | 90 | To column (source) |  |
| 70 | 10  | 90 | To column (source) |  |
| 74 | 10  | 90 | To column (source) |  |
| 75 | 95  | 5  | To column (source) |  |
| 80 | 100 | 0  | To column (source) |  |
| 95 | 100 | 0  | To column (source) |  |

\*If using a precolumn, the flow should be directed to waste.

### Run order:

This series of samples is to be run in **triplicate**. You may run the triplicate runs back-to-back or as three separate replicates with other samples or maintenance in between. If the series is run back-to-back, there is no need to run the Sample 1B (NCI20) two times in a row.

| Run number | Sample                                                    | Gradient         |
|------------|-----------------------------------------------------------|------------------|
| 1          | <b>Sample 1-B-NCI20</b>                                   | 95 min gradient  |
| 2          | Wash*                                                     |                  |
| 3          | Blank                                                     | 95 min gradient  |
| 4          | <b>Sample QC-2 –Yeast only</b>                            | 184 min gradient |
| 5          | Wash*                                                     |                  |
| 6          | Blank                                                     | 95 min gradient  |
| 7          | <b>Sample 6A - 0.25 fmol/uL<br/>Sigma 48 spiked yeast</b> | 184 min gradient |
| 8          | Wash*                                                     |                  |
| 9          | Blank                                                     | 95 min gradient  |
| 10         | <b>Sample 6B - 0.74 fmol/uL<br/>Sigma 48 spiked yeast</b> | 184 min gradient |
| 11         | Wash*                                                     |                  |
| 12         | Blank                                                     | 95 min gradient  |
| 13         | <b>Sample 6C - 2.2 fmol/uL</b>                            | 184 min gradient |

|           |                                                          |                  |
|-----------|----------------------------------------------------------|------------------|
|           | <b>Sigma 48 spiked yeast</b>                             |                  |
| 14        | Wash*                                                    |                  |
| 15        | Blank                                                    | 95 min gradient  |
| <b>16</b> | <b>Sample 6D - 6.7 fmol/uL<br/>Sigma 48 spiked yeast</b> | 184 min gradient |
| 17        | Wash*                                                    |                  |
| 18        | Blank                                                    | 95 min gradient  |
| <b>19</b> | <b>Sample 6E - 20 fmol/uL<br/>Sigma 48 spiked yeast</b>  | 184 min gradient |
| 20        | Wash*                                                    |                  |
| 21        | Blank                                                    | 95 min gradient  |
| <b>22</b> | <b>Sample QC-1 - Sigma 48<br/>only</b>                   | 184 min gradient |
| 23        | Wash*                                                    |                  |
| 24        | Blank                                                    | 95 min gradient  |
| <b>25</b> | <b>Sample 1-B-NCI20</b>                                  | 95 min gradient  |

\* As per individual laboratory protocol

### Upload Instructions for Study6: Unbiased Discovery, Yeast + Sigma48

- 1.) Browse to <https://chemdata.nist.gov/cptac/> (ignore the security warning and click OK.)
- 2.) Enter your 'log-in' name and password. These are the same as used in earlier studies. If you have forgotten either, send an email to 'paul.rudnick@nist.gov.'
- 3.) Select '**Study6**' from the selector at the top of the navigation bar.
- 4.) Click your site on the navigation bar, then the 'Experiment' button, then 'Yeast + Sigma48' to bring up to the transfer page for the dataset you are ready to upload.
- 5.) Complete the annotation form (Step1), if you have not done so already.
- 6.) Follow the instructions in box for Step 3. All data files and any annotation forms should be first copied to a **single directory** for upload. Please also include the completed SOP checklist (from this document).
- 7.) Enter the name of your SOP contact in the box at Step 4. Click 'Sign.' The 'Upload' hyperlink at Step 5 should now be active.
- 8.) Click on 'Upload' to launch Tranche (Step 5). This requires Java JRE to be installed. Browse to the directory containing your upload begin the data transfer.
- 9.) Once you see a box displaying "*Upload Complete. Please check NIST website*" your upload has completed. You do not have to leave you web browser open for the upload to continue. An e-mail receipt will be sent to the SOP contact when the upload completes. You can also view all successful uploads by clicking 'Download Data' from the navigation bar.

### Timeline for Study 6

| Task                                  | Duration | Start Date | End Date   |
|---------------------------------------|----------|------------|------------|
| NIST sends out samples for full study | 2 days   | 02/25/2008 | 02/26/2008 |
| Labs perform full study               | 30 days  | 02/27/2008 | 03/27/2008 |
| Labs upload data to Tranche           | 1 day    | 03/27/2008 | 03/28/2008 |
| Data is analyzed                      | 30 days  | 03/31/2008 | 04/25/2008 |
| Results reported to WG                | 1 day    | 05/07/2008 | 05/07/2008 |
| Yeast results reported to PCC         | 1 day    | 05/27/2008 | 05/27/2008 |

For questions about the timeline, please contact Chris Kinsinger ([kinsingc@mail.nih.gov](mailto:kinsingc@mail.nih.gov))

## CPTAC Network Listing

<http://proteomics.cancer.gov/programs/CPTAC/networkmembership/>

**Broad Institute of MIT and Harvard:** Steven A. Carr, Michael Gillette, Karl R. Clauser, Terri Addona, Susan Abbatiello, Ronald K. Blackman, Jacob D. Jaffe, Eric Kuhn, Hasmik Keshishian, Michael Burgess

**Buck Institute for Age Research:** Bradford W. Gibson, Birgit Schilling, Jason M. Held, Bensheng Li, Christopher C. Benz, Gregg A. Czerwiec, Michael P. Cusack

**California Pacific Medical Center:** Dan Moore

**Epitomics, Inc:** Xiuwen Liu, Guoliang Yu, Youling Zou

**Fred Hutchinson Cancer Research Center:** Amanda G. Paulovich, Jeffrey R. Whiteaker, Lei Zhao, ChenWei Lin, Regine Schoenherr, Pei Wang, Peggy L. Porter, Constance D. Lehman, Diane Guay, JoAnn Lorenzo, Barbara R. Stein, Marit Featherstone, Lindi Farrell, Stephanie Stafford, Julie Gralow

**Hoosier Oncology Group:** Linnette Lay, Kristina Kirkpatrick

**Indiana University:** Randy J. Arnold, Predrag Radivojac, Haixu Tang

**Indiana University-Purdue University Indianapolis:** Jake Chen, Scott H. Harrison, Harikrishna Nakshatri, Bryan Schneider

**Lawrence Berkeley National Laboratory:** Joe W. Gray, John Conboy, Anna Lapuk, Paul Spellman, Daojing Wang, Nora Bayani

**Massachusetts General Hospital:** Steven J. Skates, Trenton C. Pulsipher

**Memorial Sloan-Kettering Cancer Center:** Paul Tempst, Hans Lilja, Mark Robson, James Eastham, Clifford Hudis, Brett Carver, Josep Villanueva, Kevin Lawlor, Arpi Nazarian, Lisa Balistreri, San San Yi, Alex Lash, John Philip, Yongbiao Li, Andrew Vickers, Adam Olshen, Irina Ostrovnaya, Martin Fleisher

**Monarch Life Sciences:** Tony J. Tegeler, Mu Wang

**National Cancer Institute:** Henry Rodriguez, Tara R. Hiltke, Mehdi Mesri, Christopher R. Kinsinger

**National Cancer Institute-SAIC-Frederick:** Gordon R. Whiteley

**National Institute of Standards and Technology – Gaithersburg, MD:** Nikša Blonder, Bhaskar Godugu, Yuri Mirokhin, Pedi Neta, Jeri S. Roth, Paul A. Rudnick, Stephen E. Stein, Dmitrii Tchekhovskoi, Eric Yan, Xiaoyu (Sara) Yang, David M. Bunk, Karen W. Phinney, Nathan G. Dodder

**National Institute of Standards and Technology – Hollings Marine Lab, Charleston, SC:** Lisa E. Kilpatrick

**New York University School of Medicine:** Thomas A. Neubert, Helene L. Cardasis, David Fenyo, Chongfeng Xu, Sofia Waldemarson, Steven Blais, Åsa Wahlander

**Plasma Proteome Institute:** N. Leigh Anderson

**Purdue University:** Fred E. Regnier, Jiri Adamec, Charles Buck, Wonryeon Cho, Kwanyoung Jung, John Springer, Xiang Zhang

**Single Organism Software:** Jayson A. Falkner

**Texas A&M University:** Cliff Spiegelman, Lorenzo Vega-Montoto, Asokan Mulayath Variyath

**University of Arizona:** Dean D. Billheimer

**University of British Columbia:** Ronald C. Beavis, Dan Evans

**University of California at San Francisco:** Susan J. Fisher, Michael Alvarado, Mattheus Dahlberg, Penelope M. Drake, Matthew Gormley, Steven C. Hall, Keith D. Jones, Michael Lerch, Michael McMaster, Richard K. Nilis, Akraporn Prakobphol, H. Ewa Witkowska

**University of Michigan:** Philip C. Andrews, Mark Gjukich, Bryan Smith, James Hill

**University of North Carolina at Chapel Hill:** David F. Ransohoff

**University of Texas M.D. Anderson Cancer Center:** Gordon B. Mills, Yiling Lu, Jonas Almeida, Katherine Hale, Doris Siwak, Mary Dyer, Webin Liu, Hassan Hall, Natalie Wright

**University of Victoria:** Terry W. Pearson, Matt Pope, Martin Soste, Morteza Razavi

**University of Victoria-Genome BC Proteomics Centre:** Angela Jackson, Derek Smith, Christoph Borchers

**University of Washington:** Michael J. MacCoss, Brendan MacLean



*Vanderbilt University School of Medicine:* Daniel C. Liebler, Amy-Joan L. Ham, Lisa J. Zimmerman, Robert J.C. Slebos, David L. Tabb, Carlos L. Arteaga, Ming Li, Melinda E. Sanders, Simona G. Codreanu, Misti A. Martinez, Corbin A. Whitwell, Constantin F. Aliferis, Douglas P. Hardin, Richard M. Caprioli, Dale S. Cornett, Eric I. Purser, Matthew C. Chambers, Scott M. Sobecki, Michael D. Litton, Darla Freehardt, De Lin, Sheryl L. Stamer, Anthony Frazier, Kimberly Johnson, Ze-Qiang Ma, Matthew V. Myers, Haixia Zhang, Alexander Statnikov
